1 **Short title:** The function of NFU4 and NFU5 in *Arabidopsis*

2 Author for Contact: Janneke Balk, [janneke.balk@jic.ac.uk](mailto:janneke.balk@jic.ac.uk)

3 **Title: The Fe-S cluster assembly factors NFU4 and NFU5 are primarily required for**  
4 **protein lipoylation in mitochondria**

5 **Authors:** Jonathan Przybyla-Toscano,<sup>a,1</sup> Andrew E. Maclean,<sup>b,c,1,2</sup> Marina Franceschetti,<sup>b</sup>  
6 Daniela Liebsch,<sup>d,3</sup> Florence Vignols,<sup>e</sup> Olivier Keech,<sup>d</sup> Nicolas Rouhier,<sup>a</sup> Janneke Balk<sup>b,c,4</sup>

7 **Affiliations:**

8 <sup>a</sup>Université de Lorraine, INRAE, IAM, F-54000 Nancy, France

9 <sup>b</sup>Department of Biological Chemistry, John Innes Centre, Norwich NR4 7UH, UK

10 <sup>c</sup>School of Biological Sciences, University of East Anglia, Norwich NR4 7TJ, UK

11 <sup>d</sup>Department of Plant Physiology, Umeå Plant Science Centre, Umeå University, S-90187,  
12 Umeå, Sweden

13 <sup>e</sup>BPMP, Université de Montpellier, CNRS, INRAE, SupAgro, Montpellier, France

14

15 **One sentence summary:** A pair of evolutionarily conserved proteins involved in iron-sulfur  
16 cofactor assembly have a specific role in lipoate biosynthesis for mitochondrial  
17 dehydrogenases.

18

19 **Footnotes:**

20 <sup>1</sup>Joint first authors

21 <sup>2</sup>Current address: Wellcome Centre for Integrative Parasitology, University of Glasgow, 120  
22 University Place, Glasgow, G12 8TA, UK

23 <sup>3</sup>Current address: Instituto de Biología Molecular y Celular de Rosario, IBR-CONICET, Ocampo  
24 y Esmeralda s/n, 2000 Rosario, Argentina

25 <sup>4</sup>Author for contact: [janneke.balk@jic.ac.uk](mailto:janneke.balk@jic.ac.uk)

26

27 <sup>5</sup>This work was supported by a studentship from the John Innes Foundation to A.E.M.; the  
28 Biotechnology and Biological Sciences Research Council, grant awards BB/P012523/1 and  
29 BB/P012574/1 to M.F. and J.B; funding from the T4F and the Kempe Foundations (GÖF) to  
30 O.K.; the French National Research Agency, grant awards ANR-13-BSV6-0002-01, ANR-11-  
31 LABX-0002-01 (Lab of Excellence ARBRE) and ANR-15-IDEX-04-LUE (Lorraine Université  
32 d'Excellence) to N.R. and J.P.T.

33

34

35 The authors responsible for distribution of materials integral to the findings presented in this  
36 article in accordance with the policy described in the Instruction of Authors are: Janneke  
37 Balk (janneke.balk@jic.ac.uk) and Nicolas Rouhier (Nicolas.Rouhier@univ-lorraine.fr).

38

39 Author contributions: N.R. and J.B. conceived the study and the overall research plans; J.P.-  
40 T., A.E.M., M.F., D.L., F.V., O.K and J.B. designed and performed the experiments; all  
41 authors analysed the data. J.B. wrote the article with figures and text contributions of all  
42 authors.

## 43 **ABSTRACT**

44 Plants have evolutionarily conserved NFU-domain proteins that are targeted to plastids or  
45 mitochondria. The ‘plastid-type’ NFU1, NFU2 and NFU3 in *Arabidopsis thaliana* play a role in  
46 iron-sulfur (Fe-S) cluster assembly in this organelle, whereas the type-II NFU4 and NFU5  
47 proteins have not been subjected to mutant studies in any plant species to determine their  
48 biological role. Here we confirm that NFU4 and NFU5 are targeted to the mitochondria. The  
49 proteins are constitutively produced in all parts of the plant, suggesting a housekeeping  
50 function. Double *nfu4 nfu5* knockout mutants were embryonic lethal, and depletion of the  
51 proteins led to growth arrest of young seedlings. Biochemical analyses revealed that NFU4  
52 and NFU5 are required for lipoylation of the H proteins of the glycine decarboxylase complex  
53 and the E2 subunits of other mitochondrial dehydrogenases, with little impact on Fe-S  
54 cluster-containing respiratory complexes and aconitase. Consequently, the Gly-to-Ser ratio  
55 was increased in mutant seedlings and early growth was improved by elevated CO<sub>2</sub>. In  
56 addition, pyruvate, 2-oxoglutarate and branched-chain amino acids accumulated in the *nfu4*  
57 *nfu5* mutants, further supporting defects in the other three mitochondrial lipoylation-dependent  
58 enzyme complexes. NFU4 and NFU5 interacted with mitochondrial lipoyl synthase (LIP1) in  
59 yeast 2-hybrid and bimolecular fluorescence complementation assays. These data indicate  
60 that NFU4 and NFU5 have a more specific function than previously thought, in providing Fe-  
61 S clusters to lipoyl synthase.

## 62 **INTRODUCTION**

63 Iron-sulfur (Fe-S) clusters are inorganic cofactors with redox or regulatory functions. These  
64 labile metal cofactors are essential for the function of more than hundred different proteins  
65 involved in electron transfer, catalysis or regulatory processes in plants (Przybyla-Toscano et  
66 al., 2021a). The biosynthesis of Fe-S clusters requires dedicated assembly proteins that are  
67 conserved from bacteria to eukaryotes. Plants contain three Fe-S cluster assembly  
68 pathways, the so-called ISC (iron-sulfur cluster) pathway in the mitochondria, the SUF (sulfur  
69 mobilization) pathway in the plastids and the CIA (cytosolic iron-sulfur protein assembly)  
70 pathway for the maturation of Fe-S proteins in the cytosol and nucleus (Couturier et al.,  
71 2013; Balk and Schaedler, 2014). The mitochondrial ISC pathway provides Fe-S clusters for  
72 the respiratory complexes I, II and III of the electron transport chain, aconitase in the

73 tricarboxylic acid cycle and several enzymes in biosynthetic pathways (Przybyla-Toscano et  
74 al., 2021).

75 The proposed working mechanism of the ISC pathway is based on mutant studies in  
76 Baker's yeast, *Saccharomyces cerevisiae*, as well as extensive *in vitro* studies using  
77 orthologs from other eukaryotes (Lill and Freibert, 2020; Przybyla-Toscano et al., 2021b). In  
78 brief, and using nomenclature of the plant proteins, the first step of Fe-S cluster assembly is  
79 carried out by the cysteine desulfurase NFS1, which acquires a protein-bound persulfide ( $S^0$ )  
80 from cysteine. The persulfide is transferred to the scaffold protein ISU1, where it is reduced  
81 to sulfide ( $S^{2-}$ ) and combined with Fe to form a  $Fe_2S_2$  cluster. Next, a chaperone-  
82 cochaperone couple helps move the cluster from ISU1 to one of several so-called transfer  
83 proteins which facilitate incorporation of the correct type of cluster into client Fe-S proteins.  
84 The precise molecular roles of these transfer proteins are not known, and research has  
85 focussed on establishing their sequence of action and whether they are required for specific  
86 Fe-S proteins. The mitochondrial glutaredoxin GRXS15 is likely to accept the  $Fe_2S_2$  cluster  
87 from ISU1, as shown for yeast GRX5 (reviewed in Lill and Freibert, 2020). *In vitro* studies  
88 demonstrated that Arabidopsis GRXS15 can bind an  $Fe_2S_2$  cluster and transfer it directly to  
89 ferredoxin 1 (Moseler et al., 2015; Ströher et al., 2016; Azam et al., 2020b). (Moseler et al.,  
90 2015; Azam et al., 2020b)(Moseler et al., 2015; Azam et al., 2020b)(Moseler et al., 2015;  
91 Azam et al., 2020b)(Moseler et al., 2015; Azam et al., 2020b)(Moseler et al., 2015; Azam et  
92 al., 2020b)(Moseler et al., 2015; Azam et al., 2020b)These glutaredoxins also mediate the  
93 reductive fusion of two  $Fe_2S_2$  clusters to form a  $Fe_4S_4$  cluster on the heterodimeric ISCA1/2  
94 proteins (Brancaccio et al., 2014; Azam et al., 2020a; Weiler et al., 2020). Further *in vitro*  
95 studies showed that ISCA1/2 can transfer the  $Fe_4S_4$  cluster to NFU4 or NFU5, which can  
96 donate the cluster to aconitase 2 (Azam et al., 2020a). All mitochondrial NFU proteins  
97 studied to date form homodimers with a  $Fe_4S_4$  cluster bound to the CxxC motifs of each  
98 protomer. The Fe-S cluster binding CxxC motif is also found in INDH (Iron-sulfur cluster  
99 protein required for NADH Dehydrogenase) which has been proposed to specifically transfer  
100 Fe-S clusters to respiratory complex I (Wydro et al., 2013).

101 The NFU (NifU-like) proteins are named after the *nifU* gene in the nitrogen fixation  
102 (*nif*) regulon in *Azotobacter vinelandii* (Yuvaniyama et al., 2000). In fact, AvNifU has three  
103 protein domains that usually exist as separate proteins in other organisms: the N-terminal  
104 domain of AvNifU is homologous to ISU1, the central domain is a functional ferredoxin, and  
105 the C-terminal domain is similar to what are generically called NFU proteins (Mühlenhoff and  
106 Lill, 2000; Py et al., 2012). Based on phylogenetic analysis, four different types of NFU  
107 proteins have been identified in bacteria, of which type II in alpha-proteobacteria has been  
108 inherited by mitochondria (Py et al., 2012). In the green lineage, NFU proteins are also  
109 present in plastids. They fall outside the bacterial classification system and are characterized  
110 by a duplicated NFU sequence, of which the second sequence is degenerate and lacks the  
111 CxxC motif. Of the five NFU proteins in Arabidopsis, NFU1, NFU2 and NFU3 belong to the  
112 'plastid-type' and are indeed targeted to plastids (León et al., 2003). NFU4 (AT3G20970)  
113 and NFU5 (AT1G51390) are type-II NFU proteins. Mitochondrial localization of Arabidopsis  
114 NFU4 was supported by transient expression of a GFP fusion protein (León et al., 2003).  
115 Furthermore, it was shown that *NFU4* and *NFU5* are able to complement the yeast *nfu1Δ*  
116 and *nfu1Δisu1Δ* strains with respect to growth and biochemical phenotypes (León et al.,  
117 2003; Uzarska et al., 2018), demonstrating that the plant genes are functional orthologs of  
118 yeast *NFU1*. However, the physiological role of mitochondrial NFU proteins has not been  
119 investigated in plants.

120 Deletion of *NFU1* in yeast impairs growth on acetate as carbon source and affects  
121 specific Fe-S enzymes, such as aconitase, respiratory complex II (succinate dehydrogenase,  
122 SDH), and also lipoyl-dependent enzymes (Melber et al., 2016). The severity of the *nfu1Δ*  
123 phenotype depends on the yeast strain but is relatively mild in contrast to the essential  
124 nature of *NFU1* in mammals. A small number of mitochondrial disorders in human patients  
125 has been associated with rare mutations in the coding sequence of *NFU1* (Cameron et al.,  
126 2011; Navarro-Sastre et al., 2011; Mayr et al., 2014). *NFU1* patients commonly display  
127 infantile encephalopathy with symptoms such as hyperglycinaemia and lactic acidosis, which  
128 in severe cases is fatal in the first year of life. Biochemical tests on muscle biopsies or  
129 fibroblasts showed decreased activities of lipoylated enzymes and, in some but not all cases,  
130 a decrease in aconitase and SDH activity.

131 In eukaryotes, there are four mitochondrial lipoyl-dependent enzyme systems,  
132 pyruvate dehydrogenase (PDH),  $\alpha$ -ketoglutarate dehydrogenase (KGDH), branched-chain  $\alpha$ -  
133 ketoacid dehydrogenase (BCKDH) and glycine decarboxylase complex (GDC), also referred  
134 to as the glycine cleavage system. The PDH, KGDH and BCKDH complexes consist of three  
135 different subunits (E1 - E3), of which E2 is lipoylated. The structure of GDC complex differs,  
136 being composed of four proteins named L, P, T and H, with lipoyl bound to the H protein.  
137 The lipoyl cofactor (6,8-dithiooctanoic acid) mediates the oxidative decarboxylation reactions  
138 carried out by those enzyme complexes (Mayr et al., 2014). The 8-carbon fatty acid is  
139 covalently bound to proteins via a lysine residue, forming a lipoamide, and contains two  
140 sulfur atoms at C6 and C8 that are inserted by lipoyl synthase. The sulfur atoms are  
141 provided by the auxiliary Fe<sub>4</sub>S<sub>4</sub> cluster of lipoyl synthase. Therefore, this cluster needs to be  
142 reassembled after every catalytic cycle. *In vitro* studies showed that the bacterial NfuA  
143 protein enabled catalytic rates of lipoyl formation by its ability to reconstitute the auxiliary  
144 cluster of lipoyl synthase (McCarthy and Booker, 2017).

145 Here we show that the Arabidopsis *NFU4* and *NFU5* proteins perform an essential  
146 function in mitochondria. Analysis of several mutant lines showed that low levels of the *NFU*  
147 proteins are sufficient for normal growth, but their near-complete depletion revealed a defect  
148 in protein lipoylation, affecting substrate turnover by lipoate-dependent enzyme complexes  
149 such as GDC, KGDH and BCKDH.

150

151 **RESULTS**

152

153 ***NFU4* and *NFU5* are soluble mitochondrial matrix proteins**

154 A previous study showed that transient expression of a fusion protein of the first 116 amino  
155 acids of *NFU4* with GFP was targeted to mitochondria in Arabidopsis protoplasts (León et  
156 al., 2003). However, the localization of *NFU5* was not experimentally tested. Some evidence  
157 for the presence of *NFU5* in mitochondria has been obtained by proteomics studies (Ito et  
158 al., 2006; Tan et al., 2010; Fuchs et al., 2020), but has so far not been confirmed by other  
159 approaches. Therefore, we cloned the predicted mitochondrial targeting sequences (MTS) of  
160 *NFU4* and *NFU5* in frame with the *GFP* coding sequence. The length of the MTS of each  
161 protein was determined by combining several *in silico* analyses such as target peptide  
162 prediction algorithms, the distribution of acidic amino acids and alignment with eukaryotic  
163 and prokaryotic homologs. Following this, amino acids 1 to 79 for *NFU4* and 1 to 74 for  
164 *NFU5* were assigned as MTS. The fusion genes were placed under the control of a double  
165 *CaMV* 35S promoter and transformed into Arabidopsis protoplasts. Both *NFU4*<sub>MTS</sub>-GFP and  
166 *NFU5*<sub>MTS</sub>-GFP showed a punctate pattern of GFP which co-localized with MitoTracker dye,  
167 but was distinct from the chloroplast autofluorescence (Supplemental Fig. S1A). Protein blot  
168 analysis of total and mitochondrial protein fractions confirmed the enrichment of the native  
169 *NFU4* and *NFU5* proteins in mitochondria (Supplemental Fig. S1B). Furthermore,  
170 fractionation of the mitochondria into soluble matrix and membrane fractions indicated that  
171 *NFU4* and *NFU5* are matrix proteins, similar to *ISU1* and *GRXS15* (Supplemental Fig. S1C).

172

173 ***NFU4* and *NFU5* proteins are abundant in all plant organs**

174 Antibodies raised against *NFU4* cross-reacted with *NFU5* and vice versa, which is not  
175 surprising as the mature proteins share 90% amino acid identity. To determine which of the  
176 two immune signals with similar gel mobilities belongs to *NFU4* and *NFU5*, and for  
177 subsequent mutant studies, we obtained three mutant alleles each for *nfu4* and *nfu5* (Fig.  
178 1A).

179 Quantitative reverse transcription PCR (RT-qPCR) showed a virtual absence of  
180 *NFU4* transcripts in homozygous *nfu4-2* and *nfu4-4* single mutant plants, whereas ~10%  
181 transcript remained in the *nfu4-1* mutant (Fig. 1B). Expression of *NFU5* was strongly  
182 diminished in the *nfu5-1* line (Fig. 1B). The *nfu5-2* mutant had approximately 15% less *NFU5*  
183 transcript compared to its respective wild type, consistent with insertion of the T-DNA in the  
184 promoter, 251 nucleotides upstream of the ATG start codon. For the *nfu5-3* mutant, qPCR  
185 analysis suggested that the transcript levels of *NFU5* were strongly increased, but this result  
186 is likely due to the presence of an outward facing promoter sequence at the right T-DNA  
187 border and the qPCR primers being downstream of this. Probing for full-length *NFU5*  
188 transcript by RT-PCR showed that the transcript is lacking in the *nfu5-3* mutant (Fig. 1B,  
189 right panel), as expected from the position of the T-DNA in exon 2 (Fig. 1A).

190 Protein blot analysis using anti-*NFU4* serum showed that the upper immune signal is  
191 absent in the *nfu4-2* and *nfu4-4* mutants, and that the lower signal is missing in the *nfu5-1*  
192 and *nfu5-3* mutant alleles (Fig. 1C). The native protein products of *NFU4* and *NFU5* could  
193 thus be assigned and their electrophoretic mobilities match the calculated molecular weights  
194 of 22.1 kDa for *NFU4* and 21.7 kDa for *NFU5* without their predicted MTS. The levels of  
195 *NFU5* protein produced from the *nfu5-2* allele were assessed by semi-quantitative protein  
196 blot analysis in plants homozygous for the *nfu4-2* allele, to rule out signal contribution from

197 *NFU4*. The *NFU5* protein level was ~15% less in the *nfu4-2 nfu5-2* double mutant compared  
198 to wild type (Fig. 1D; Supplemental Fig. S2), matching the decrease in *NFU5* transcripts (Fig.  
199 1B).

200 Publicly available RNA-seq data ([bar.utoronto.ca](http://bar.utoronto.ca)) indicated that *NFU4* and *NFU5* are  
201 expressed throughout the plant's life cycle and in all organs. Protein blot analysis using  
202 protein extracts from roots, leaves, stems and reproductive organs confirmed that *NFU4* and  
203 *NFU5* proteins are expressed in all organs, with slightly lower levels in stems and slightly  
204 higher levels in flower buds and flowers, based on total protein (Fig. 2A). Densitometry and  
205 quantification of the immune signals relative to known amounts of recombinant protein  
206 indicated that *NFU4* was approximately 2-fold more abundant than *NFU5* (Fig. 2B), in  
207 agreement with a recent quantitative analysis of all mitochondrial proteins (Fuchs et al.,  
208 2020).

### 209 ***NFU4* and *NFU5* are redundant genes, but together are essential for embryo** 210 **development**

211 In order to evaluate the physiological importance of *NFU4* and *NFU5*, the available T-DNA  
212 insertion lines were grown on soil under long-day conditions. The three different mutant lines  
213 for *NFU4* or *NFU5* showed normal growth and development of the rosette leaves compared  
214 to their respective wild-type plants (Fig. 3A). The growth rate of primary roots in young  
215 seedlings, which is particularly sensitive to mitochondrial defects, was decreased by 8% in  
216 the *nfu4-2* mutant but a decrease in the *nfu4-4* mutant was not statistically significant  
217 (Supplemental Fig. S3A, B). Root growth in the *nfu5-1* mutant was ~30% decreased,  
218 whereas *nfu5-2* root length was similar to wild type (Supplemental Fig. S3C, D), as expected  
219 based on the weak nature of this mutant allele. In addition, the seedlings were challenged  
220 with Paraquat (methyl viologen) in the medium, which strongly inhibited growth of an *E. coli*  
221 *nfuAD* strain (Angelini et al., 2008) and is a well-known inducer of oxidative stress in  
222 mitochondria (Cochemé and Murphy, 2008). A concentration of 10 nM Paraquat was chosen  
223 based on experimental calibration, resulting in 20% inhibition of wild-type root growth.  
224 However, Paraquat treatment did not specifically affect the mutants more than the wild-type  
225 controls (Supplemental Fig. S3). Taken together, these observations indicate that aside from  
226 a role in root elongation, individually neither *NFU4* nor *NFU5* perform a critical function under  
227 normal growth conditions.

228 To generate double mutants, we made reciprocal crosses between *nfu5-1* and *nfu4-2*  
229 or *nfu4-4* plants. In the F2 generation, double mutants could not be isolated despite  
230 extensive screening by PCR. Therefore, the siliques of *nfu4-2<sup>-/-</sup> nfu5-1<sup>-/+</sup>* and *nfu4-4<sup>-/-</sup> nfu5-1<sup>-/+</sup>*  
231 plants were dissected to analyse embryo development. Approximately one quarter of the  
232 immature seeds were white (Fig. 3B, C), containing embryos arrested at the globular stage  
233 (Fig. 3D). Based on these numbers it is reasonable to assume that the white seeds are  
234 double knockout *nfu4 nfu5*, and that a complete lack of both *NFU4* and *NFU5* protein is  
235 detrimental for embryo development.

236

### 237 **Functional relationship between *ISU1*, *NFU4* and *NFU5***

238 In yeast, the mild growth defect as a result of *NFU1* deletion (*nfu1Δ*) is enhanced in an  
239 *isu1Δnfu1Δ* double mutant, underscoring the functional relationship of the *ISU1* and *NFU1*  
240 proteins (Schilke et al., 1999). It should be noted that the yeast *isu1Δ* mutant is viable  
241 because of a second *ISU* gene, *ISU2*, but evidently this cannot fully replace the function of  
242 *ISU1*. Arabidopsis has three *ISU* paralogs, each of which can functionally substitute for the

243 yeast *ISU1* homolog in the *isu1Δnfu1Δ* strain (León et al., 2005). The *Arabidopsis ISU1* gene  
244 is thought to be the main Fe-S scaffold protein in mitochondria, because *ISU2* and *ISU3*  
245 have very low expression levels and are almost exclusively expressed in pollen grains (León  
246 et al., 2005; Frazzon et al., 2007). In agreement with this, we found that the *isu1-2* allele, in  
247 which 61 nucleotides directly upstream of the ATG are deleted due to a T-DNA insertion, is  
248 embryonic lethal (Supplemental Table S1). The previously reported *isu1-1* allele, with a T-  
249 DNA insertion at nucleotide -65 but with intact sequence up to the start codon, is viable  
250 (Frazzon et al., 2007) (Supplemental Fig. S4A). *ISU1* protein levels in the *isu1-1* line are  
251 decreased to ~20% of wild type (Supplemental Fig. S4B). In cell culture generated from the  
252 roots of *isu1-1* seedlings, the levels of *NFU4*, *NFU5*, *INDH* and aconitase were normal, and  
253 the activity of respiratory complex I was also comparable to wild type (Supplemental Fig.  
254 S4B, C). Interestingly, *GRXS15* protein levels were strongly decreased in the *isu1-1* mutant.

255 Rosettes of *isu1-1* plants were phenotypically indistinguishable from wild type, but  
256 seedlings had a 20% decrease in root elongation, which was exacerbated to 40%  
257 impairment in the presence of Paraquat (Supplemental Fig. S4D, E). This phenotype may be  
258 correlated with decreased *GRXS15* levels, since *grxs15* mutants have strongly impaired root  
259 growth (Ströher et al., 2016). To investigate genetic interactions between *ISU1* and *NFU4* or  
260 *NFU5*, the *isu1-1* line was crossed with *nfu4* and *nfu5* mutant alleles. Crosses involving any  
261 of the *nfu5* alleles and *isu1-1* were unsuccessful, despite multiple attempts in reciprocal  
262 combinations. In contrast, double *isu1-1 nfu4* mutants were isolated from the F2, and had a  
263 shorter root length but not an enhanced growth defect (Supplemental Fig. S4D).

264 Thus, mild growth impairment of the primary root in seedlings with less than 20%  
265 *ISU1* is not enhanced by deletion of *NFU4*. This is in agreement with the model that *NFU*  
266 proteins function downstream from *ISU1* in Fe-S cluster transfer, and not as an alternative  
267 assembly scaffold.

268

## 269 **Low amounts of *NFU5* alone are sufficient for normal mitochondrial function in** 270 **vegetative tissues**

271 The normal rosette growth of single *nfu4* and *nfu5* mutants does not preclude defects in Fe-  
272 S enzyme activities. For example, up to 80% of complex I activity can be lost in *Arabidopsis*  
273 without major growth penalties (Meyer et al., 2011). To analyse the levels and/or activities of  
274 major ISC maturation factors and mitochondrial Fe-S enzymes as a consequence of loss of  
275 *NFU4* and/or *NFU5*, mitochondria were purified from 2-week-old seedlings. Protein blot  
276 analyses showed no differences in the levels of *ISU1*, *GRXS15*, *INDH* and aconitase  
277 between *nfu4-2*, *nfu4-4* and *nfu5-1* and wild type (Supplemental Fig. S5A). Labelling with  
278 antibodies against lipoate also showed no differences in the abundance of lipoylated  
279 proteins (Supplemental Fig. S5B). To analyse the levels of mitochondrial respiratory  
280 complexes, we generated cell cultures from primary roots, then purified mitochondria for  
281 blue-native PAGE. Protein complexes were stained with Coomassie Blue (Supplemental Fig.  
282 S5C), and complex I and complex II were additionally visualized by in-gel activity staining  
283 (Supplemental Fig. S5D, E). Again, no differences in the levels or the activities of these  
284 major Fe-S cluster-dependent complexes were detected in single mutants compared with  
285 wild-type plants.

286 To obtain viable plants with strongly diminished *NFU4* and *NFU5* protein levels, mutant  
287 alleles were combined via crossing. *nfu4-2 nfu5-2* plants lack *NFU4* protein and have ~85%  
288 *NFU5* compared to wild type, whereas hemizygous *nfu4-2 nfu5-1/nfu5-2* plants have only

289 ~42.5% *NFU5* (Fig. 4A). The size and fresh weight of the rosettes of hemizygous plants  
290 were similar to wild type (Fig. 4B; Supplemental Fig. S6). In root growth assays, the double  
291 mutant seedlings performed similarly to the Col-4 parent. However, in the presence of  
292 Paraquat, there was a small but significant decrease in root growth in the hemizygous  
293 mutant (Supplemental Fig. S3E). Because of a lipoate biosynthesis defect in yeast and  
294 mammalian *nfu* mutants, we further tested growth of the Arabidopsis *nfu4-2 nfu5-2* double  
295 mutants under low CO<sub>2</sub> (150 ppm) which should bring out defects in GDC. However, no  
296 obvious differences in either fresh or dry weight biomass were observed between mutant  
297 and wild-type plants (Supplemental Fig. S6).

298 To follow up the growth assays, biochemical analyses were carried out on  
299 mitochondria purified from cell culture of hemizygous *nfu4-2 nfu5-1/nfu5-2* and homozygous  
300 *nfu4-2 nfu5-2* seedlings. Protein blot analyses showed no differences in the levels of the  
301 mitochondrial Fe-S cluster assembly proteins ISU1, GRXS15 and INDH and the Fe-S  
302 enzyme aconitase (Fig. 4A). The only observed difference was a decrease in the levels of  
303 the H2 protein of GDC. The levels of respiratory complexes I and III in the viable *nfu4 nfu5*  
304 double mutants were comparable to wild type (Fig. 4C). Taken together, these biochemical  
305 studies show that *NFU4* and *NFU5* are largely redundant during vegetative development;  
306 and suggest that small amounts of *NFU5* are sufficient to sustain key mitochondrial  
307 functions.

308

### 309 **Depletion of *NFU4* and *NFU5* causes a pleiotropic growth defect and accumulation of** 310 **substrates of lipoate-dependent enzyme complexes**

311 To uncover the phenotypic effects of a complete lack of *NFU4* and *NFU5* in vegetative  
312 tissues and circumvent embryo lethality, *NFU4* was placed under the control of the *ABI3*  
313 promoter (Rohde et al., 1999; Despres et al., 2001) and transformed into hemizygous *nfu4-2*  
314 <sup>-</sup> *nfu5-1/nfu5-2* plants (Fig. 5A). The *ABI3* promoter drives expression in developing and  
315 germinating seeds and can be used to study essential genes (Despres et al., 2001). Positive  
316 transformants were selected on hygromycin-containing plates, and three seedlings carrying  
317 the *nfu5-1* knockout allele were identified by PCR for further study (independent lines 1, 4  
318 and 10). In the next generation (T2), seedlings segregated in approximately 21 – 25% with a  
319 severe growth phenotype and 75 – 79% with normal growth. Leaves of the mutant seedlings  
320 turned white upon emergence, and growth was arrested at the second pair of true leaves  
321 (Fig. 5B). PCR analysis confirmed that the mutant (m) seedlings lacked a functional copy of  
322 *NFU5*, whereas the wild-type-like (wtl) siblings carried the *nfu5-2* allele with an intact *NFU5*  
323 open reading frame (Fig. 5C). In agreement with the genotyping results, the mutant  
324 seedlings lacked *NFU5* protein, whereas the *NFU5*-specific protein band was present in the  
325 wtl seedlings (Fig. 5D). In both mutant and wtl segregants, the protein levels of *NFU4* were  
326 either undetectable or very low, reflecting the combined effect of the *nfu4-2* allele and *ABI3*  
327 promoter-driven *NFU4* expression.

328

329 In an attempt to overcome growth arrest, the segregating T2 generation was grown  
330 under elevated CO<sub>2</sub>. We reasoned that the observed photobleaching of the mutant seedlings  
331 could be due to a defect in photorespiration. Under high CO<sub>2</sub>, photorespiration is prevented  
332 and impairment of GDC is tolerated, except when it is so low as to affect one-carbon  
333 metabolism (Peterhansel et al., 2010). Indeed, when seedlings were germinated and grown  
334 under high CO<sub>2</sub>, segregating *nfu4 nfu5* mutant seedlings were more difficult to distinguish  
335 from wtl siblings in the first two weeks, as double mutants remained green and started to  
develop a third pair of true leaves (Fig. 6A). However, soon after transferring the seedlings



336 from agar plates to soil in the high CO<sub>2</sub> cabinet, the *nfu4 nfu5* mutants turned white and their  
337 growth was arrested before the inflorescence was formed (Supplemental Fig. S7).

338 To investigate if GDC activity was decreased in the mutants, we measured the  
339 concentration of glycine and serine as well as other free amino acids using LC-MS. Glycine  
340 accumulated 8-fold in the mutant compared to wtl seedlings (Fig. 6B; Supplemental Table  
341 S2). The Gly:Ser ratio of 3.5 in the mutant versus a ratio of 1 in wtl is indicative of impaired  
342 GDC activity in the mutant (Timm et al., 2012; Reinholdt et al., 2021). It should be noted that  
343 the serine levels we measured in control (wtl) seedlings were approximately 2-fold lower  
344 than routinely measured in rosette leaves of Arabidopsis but the levels of other amino acids  
345 were comparable to published values (reviewed in (Hildebrandt et al., 2015)).

346 Additionally, the branched-chain amino acids leucine and valine were significantly  
347 increased in concentration compared with wtl, and the isoleucine concentration was elevated  
348 although not significant (Supplemental Table S2). This suggests that the lipoyl-dependent  
349 enzyme complex BCKDH has decreased functionality. Of the other amino acids, alanine and  
350 phenylalanine levels were on average more than 7-fold increased in the mutant, but the  
351 levels were very variable in the 3 biological replicates of the mutant. Similarly, arginine,  
352 asparagine, lysine and tryptophan were >2-fold increased in the mutant, and aspartic acid  
353 was >2-fold decreased, but not statistically significant because of large variation.

354 To identify changes in pyruvate and TCA cycle intermediates, we measured the  
355 concentrations of selected organic acids by LC-MS/MS. The *nfu4 nfu5* mutant accumulated  
356 10-fold more  $\alpha$ -ketoglutarate than the wtl segregants and wild type, indicating that the  
357 activity of KGDH is impaired (Fig. 6B; Supplemental Table S3). The concentration of  
358 pyruvate in the mutant was 2-fold higher than in wild type seedlings and 1.5-fold higher than  
359 in wtl. Citrate and malate concentrations were lower in the *nfu4 nfu5* mutant seedlings,  
360 whereas succinate was elevated in both the mutant and wtl segregant compared to wild-type  
361 seedlings (Fig. 6B; Supplemental Table S3). Together, these results indicate that *NFU4* and  
362 *NFU5* are required for the function of GDC as well as the other major mitochondrial enzyme  
363 complexes that depend on lipoate as a cofactor.

#### 364 ***NFU4* and *NFU5* are required for lipoylation of GDC H proteins and E2 subunits of** 365 **mitochondrial dehydrogenase enzyme complexes**

366 To investigate a possible decrease in protein-bound lipoyl cofactor in the *nfu4 nfu5* mutant,  
367 immunoblots of total plant protein extracts were labelled with antibodies against lipoate. This  
368 showed a pattern similar to those previously published and proteins were assigned  
369 accordingly (Ewald et al., 2014; Ströher et al., 2016; Guan et al., 2017). We observed that  
370 *nfu4 nfu5* mutant seedlings lacked a signal with an electrophoretic mobility of 15 kDa  
371 corresponding to the lipoylated H1 + H3 proteins of GDC (Fig. 6C, upper panel). The  
372 mutants also showed a decreased signal at ~65 kDa, assigned as the E2b subunit isoform of  
373 the PDH complex, compared to wild type (WT) and wild-type like (wtl) segregants. The  
374 signal corresponding to the 82-kDa E2a subunit of PDH was slightly decreased in the mutant  
375 compared to WT, but increased in wtl seedlings. The 45 kDa band was assigned to the E2  
376 subunit proteins of plastid-localized PDH, which had similar levels of lipoylation in the mutant  
377 and WT plants.

378 To probe whether non-lipoylated H proteins were present in the mutant lines, a  
379 parallel blot of the same samples was probed with an antibody that recognizes H isoforms  
380 from a range of plant species including the 3 isoforms in Arabidopsis (Ströher et al., 2016).  
381 The signal from the H1 and H3 isoforms at 15 kDa was strongly decreased in the *nfu4 nfu5*  
382 mutant, pointing to destabilization of these subunits due to a lack of bound lipoate. The

383 mature H2 protein has a theoretical mass similar to H1 and H3, but as noted before, it has a  
384 lower electrophoretic mobility in SDS-PAGE (Fig. 6C, middle panel), possibly because of its  
385 unusual low pI (Lee et al., 2008; Ströher et al., 2016). The two signals assigned as H2 likely  
386 correspond to the lipoylated and non-lipoylated forms (Ströher et al., 2016). The major H2  
387 isoform present in wtl and WT was barely detectable in *nfu4 nfu5* seedlings. These data  
388 indicate that NFU4 and NFU5 are required for protein lipoylation in mitochondria, strongly  
389 affecting the H subunits of GDC and to a lesser extent the E2 subunits of PDH.

390

### 391 **Aconitase and complex II activities are normal in seedlings depleted of NFU4 and** 392 **NFU5**

393 Since high CO<sub>2</sub> conditions only partially rescued the severe phenotype of *nfu4 nfu5* mutants,  
394 we assessed the overall mitochondrial respiration rate by measuring O<sub>2</sub> consumption in  
395 intact mutant and wtl seedlings in the dark. The *nfu4 nfu5* double mutant showed a 5-fold  
396 decrease in respiration compared to wild-type seedlings and segregating wtl siblings (Fig.  
397 7A), in line with defects in key mitochondrial enzyme complexes. In the yeast *nfu1Δ* mutant,  
398 the activities of the Fe-S enzymes aconitase and SDH/complex II were decreased by ~25%  
399 (Melber et al., 2016; Uzarska et al, 2018). Measurements of aconitase activity in total plant  
400 extracts showed a decrease of ~50% in the *nfu4 nfu5* mutant compared to wild-type  
401 seedlings and a decrease of 30% compared to wtl segregants, although the latter was not  
402 statistically significant (Fig. 7B). However, in plants grown under high CO<sub>2</sub>, aconitase activity  
403 was 2-fold higher than under ambient CO<sub>2</sub> levels and similar in the mutant and wtl  
404 segregants (Fig. 7B). This suggests that any decrease in aconitase activity may be a  
405 secondary defect, caused by, for example, limited carbon flux through the tricarboxylic acid  
406 cycle. This is in agreement with the observed decrease in citrate and malate (Fig. 6B).

407 To measure complex II activity, mutant and wtl segregants were pooled for small-  
408 scale mitochondrial preparations. Of the different enzyme assays for complex II, succinate to  
409 ubiquinone reduction (SQR) using 2,6 dichloroindophenol as electron acceptor gave the  
410 most robust results in relatively impure mitochondrial preparations (León et al., 2007). The  
411 activity was measured before and after addition of the complex II inhibitor 2-  
412 thenoyltrifluoroacetone (TTFA) to distinguish complex II activity from other succinate  
413 reduction reactions. The TTFA-sensitive succinate turnover was similar in all three  
414 genotypes, i.e. *nfu4 nfu5* mutant, wtl segregants and true wild type (Fig. 7C). Thus, both  
415 aconitase and SDH had a normal operational capacity in *nfu4 nfu5* mutant seedlings, in  
416 contrast to the decrease in activities of these enzymes in yeast *nfu1Δ* mutants.

### 417 **NFU4 and NFU5 proteins interact with the mitochondrial lipoyl synthase LIP1**

418 Previously, Arabidopsis NFU4 and NFU5 were shown to interact with the late-acting ISC  
419 proteins ISCA1a and ISCA1b (Azam et al., 2020a). To test if NFU4 and NFU5 can interact  
420 with downstream client Fe-S proteins, we carried out yeast 2-hybrid assays with  
421 mitochondrial lipoyl synthase (LIP1), biotin synthase (BIO2) and the major aconitase protein  
422 localized to mitochondria (ACO2). Biotin synthase is similar to lipoyl synthase in that an  
423 auxiliary Fe-S cluster is destroyed to donate a sulfur atom in the last step of biotin synthesis,  
424 except that this cluster is a Fe<sub>2</sub>S<sub>2</sub> cluster rather than a Fe<sub>4</sub>S<sub>4</sub> cluster. Mitochondrial targeting  
425 sequences were removed from the coding sequences, which were cloned behind the  
426 activation domain (AD) or DNA binding domain (BD) of the Gal4 transcriptional activator.  
427 Yeast growth on medium without histidine indicated that the *HIS3* reporter gene is  
428 transcribed as a consequence of a direct protein interaction between NFU4/5 and LIP1 (Fig.  
429 8A). The growth persisted under more stringent conditions with 3-amino-1,2,4-triazole (3AT),

430 a competitive inhibitor of the *HIS3* gene product, suggesting that the interaction between  
431 NFU4, or NFU5, with LIP1 is relatively strong. However, no interactions between NFU4/5  
432 and BIO2, nor with ACO2, were detected in these assays.

433 To assess NFU4/5-LIP1 interactions in plant cells, we additionally performed bimolecular  
434 fluorescence complementation (BiFC) assays in Arabidopsis protoplasts using the LIP1  
435 coding region fused upstream of the N-terminal domain of the YFP protein, and NFU  
436 proteins fused upstream of the C-terminal region of YFP (LIP1-N and NFU-C, respectively, in  
437 Fig. 8B and Supplemental Fig. S9). Positive BiFC signals indicated that LIP1 is in close  
438 proximity to NFU4 and NFU5 within plant cells, and that the LIP1 interaction with NFU4 or  
439 NFU5 occurs in the mitochondria as highlighted by the overlap of the YFP fluorescence with  
440 MitoTracker dye (Fig. 8B, merged panels). None of the proteins expressed alone could  
441 restore YFP fluorescence as previously shown (Azam et al., 2020a). Together, these results  
442 indicate that NFU4 and NFU5 interact equally well with LIP1 in the mitochondria, and likely  
443 assist with the insertion or repair of Fe-S clusters in LIP1.

444

445

## 446 DISCUSSION

447 The physiological function of the mitochondrial NFU proteins has thus far not been studied in  
448 plants, except for one study in sweet potato which found that the gene encoding a  
449 mitochondrial NFU was upregulated under salt stress in a salt-tolerant variety (Wang et al.,  
450 2013). Here we show that the mitochondrial NFU proteins perform a key function in lipoate-  
451 dependent metabolism in the model plant *Arabidopsis*, most likely by providing Fe-S clusters  
452 to lipoyl synthase as shown for bacterial NfuA.

453 *Arabidopsis* has two paralogous genes, *NFU4* and *NFU5*, each encoding a functional  
454 mitochondrial NFU protein of relatively high abundance (Figs. 1 – 3). While no obvious  
455 growth phenotypes were observed in *nfu4* or *nfu5* single mutants, some of our findings  
456 suggest that *Arabidopsis* *NFU4* and *NFU5* may not be fully redundant. Single *nfu4* and *nfu5*  
457 mutants had impaired primary root growth in young seedlings (Supplemental Fig. S3).  
458 Moreover, during reproductive development, *nfu5* mutants could not be crossed with the  
459 *isu1-1* mutant as male or female parent, despite a functional copy of *NFU4* (Supplemental  
460 Fig. S4). Possibly, cell-specific expression of *NFU4* and *NFU5* in some specialized cell  
461 types, or differences in protein stability, could underlie these observations. Related to this is  
462 the question of whether *NFU4* and *NFU5* can form heterodimers or exist exclusively as  
463 homodimers. The yeast 2-hybrid assay testing for *NFU4*-*NFU5* interaction was negative  
464 (Azam et al., 2020a), which is not due to technical issues since the same constructs showed  
465 positive interactions with other mitochondrial proteins such as ISCA1/2 (Azam et al., 2020a)  
466 and LIP1 (Fig. 8A). Thus, *NFU4* and *NFU5* are likely functioning as homodimers, with mostly  
467 overlapping but perhaps not identical physiological functions, which will be interesting to  
468 delineate in future studies.

469 The double knockout mutant of *NFU4* and *NFU5* in *Arabidopsis* is embryonic lethal  
470 (Fig. 3B-D), demonstrating that mitochondrial NFUs are essential in plants. The single *NFU1*  
471 homolog is also essential in mammals but the yeast gene is non-essential. How could this  
472 difference be explained? Lipoyl synthase is the main client Fe-S protein in all three types of  
473 organisms and an essential enzyme in higher eukaryotes, but not in yeast (Cronan, 2016).  
474 This is because lipoyl enzyme complexes can be bypassed, especially when yeast is grown  
475 on glucose and switches to fermentation. In bacteria, loss of lipoyl synthase (LipA) can be  
476 overcome by supplementation with lipoate in the medium (McCarthy and Booker, 2017), but  
477 this cannot rescue yeast *lip5* mutants (Sulo and Martin, 1993). Whether plant mutants in  
478 lipoyl synthase can be chemically complemented by external lipoate has not been  
479 investigated to our knowledge, but we found that addition of lipoate to the medium did not  
480 rescue the growth of *nfu4 nfu5* mutant seedlings in any way (Supplemental Fig. S10). The  
481 relatively high abundance of *NFU4* and *NFU5* compared to other Fe-S cluster maturation  
482 proteins would fit with a role of NFU proteins in reassembling the auxiliary cluster of LIP1,  
483 which is constantly turned over to insert two sulfurs into lipoyl cofactor. Particularly  
484 mitochondria in leaf mesophyll cells have a very high demand of lipoate for the H proteins of  
485 GDC.

486 To obtain *nfu4 nfu5* mutant lines with a clear phenotype, we used a strategy based  
487 on the transcriptional depletion of *NFU4* in a *nfu4 nfu5* genetic background (Fig. 5), after  
488 other approaches gave non-viable plants or no visible growth defects (e.g. Fig. 4). While the  
489 depletion approach was stringent and robust, the seedlings did not develop further than the  
490 2-leaf stage, as reported for other essential genes (Rohde et al., 1999; Despres et al., 2001).  
491 This limited biochemical assays, especially since it was not possible to isolate mitochondria  
492 from the double mutant for enzyme assays. However, protein blot analysis showed a striking

493 decrease in lipoylated proteins, especially the H proteins, and metabolite analysis provided  
494 further evidence of blocks in specific mitochondrial processes. While some variation between  
495 biological replicates of the mutant, for example in amino acid levels, could have been due to  
496 the precise timing of sampling relative to growth arrest, several highly significant changes  
497 were noted that have also been observed in other mutants in the lipoate biosynthesis  
498 pathway. Specifically, accumulation of glycine and elevated serine has so far been observed  
499 in all mutants affected in lipoyl cofactor biosynthesis and its octanoyl precursor (Ewald et al.,  
500 2014; Guan et al., 2017; Fu et al., 2020; Guan et al., 2020). Weaker mutant alleles (e.g.  
501 RNAi lines or non-essential genes) are primarily affected in the lipoylation of H proteins,  
502 whereas stronger alleles also showed decreased lipoylation of E2 subunits of PDH and  
503 KGDH. Interestingly, mutation of *GRXS15*, the mitochondrial glutaredoxin associated with  
504 the Fe-S cluster assembly pathway, also primarily affects lipoyl biosynthesis but not other  
505 Fe-S cluster-dependent processes (Ströher et al., 2016; Moseler et al., 2021). In-depth  
506 metabolomics analysis of a *grxs15* K83A mutant line showed accumulation of glycine,  
507 branched-chain amino acids and their keto-acids, a 5-fold increase in pyruvate but no  
508 significant difference in  $\alpha$ -ketoglutarate (Moseler et al., 2021). Decreased lipoylation of the H  
509 proteins coincided with lower abundance of the polypeptides, as seen in *nfu4 nfu5* mutants  
510 (Fig. 6C).

511 *NFU1* mutations in human cells and yeast are known to cause defects in specific Fe-  
512 S enzymes, namely complex II and aconitase (Mayr et al., 2014; Melber et al., 2016). In  
513 Arabidopsis we saw no marked impairment of the activities of these enzymes in either single  
514 mutants or the *nfu4 nfu5* double mutant (Figs 4, S5 and 7). However, metabolite analysis of  
515 young leaves showed accumulation of succinate to similar levels in both *nfu4-2* and *nfu4-2*  
516 *nfu5-1* seedlings, suggesting that NFU4 may have a specific role in supporting succinate  
517 dehydrogenase function. Similarly, aconitase activity was slightly but significantly decreased  
518 in the double mutant compared to wild type when grown under standard conditions. By  
519 contrast, yeast 2-hybrid assays were negative for a protein interaction between NFU4 and  
520 ACO2 (Fig. 8). Interestingly, *in vitro*, ACO2 can receive an Fe-S cluster from NFU4 or NFU5  
521 (Azam et al., 2020a), but this may simply reflect a possible thermodynamic transition, and  
522 not a physiological event. Alternatively, if ACO2 can receive its cluster directly from ISCA1/2  
523 *in vivo*, this would bypass NFU4/5. It is also possible that the decreased aconitase and  
524 complex II activities represent an indirect effect of strong impairment of PDH. Further  
525 investigations are necessary to establish if NFU proteins do play a minor role in Fe-S cluster  
526 assembly on other proteins than lipoyl synthase.

527 The mitochondrial NFU proteins differ from their plastid counterparts in both structure  
528 and function. The plastid NFU proteins have an extra C-terminal domain which is a copy of  
529 NFU but lacking the CxxC motif. The function of this second domain is as yet unclear.  
530 Mutant analysis has shown that NFU1, NFU2 and NFU3 have partially overlapping functions  
531 required for the stability of Photosystem I and other plastid Fe-S proteins (Touraine et al.,  
532 2004; Yabe et al., 2004; Touraine et al., 2019; Berger et al., 2020; Roland et al., 2020).  
533 Interestingly, one of the proteins found to interact with NFU2 using yeast 2-hybrid and BiFC  
534 assays was the plastid isoform of lipoyl synthase LIP1p (Berger et al., 2020). The levels of  
535 lipoyl cofactor on the plastid PDH E2 subunits have not been analysed to date. Plastid PDH  
536 is an essential enzyme in fatty acid synthesis, and defects in this pathway have pleiotropic  
537 effects on photosynthesis (Bao et al., 2000; Ke et al., 2000).

538 In summary, our functional study of the plant mitochondrial NFU proteins reveals  
539 their importance for lipoyl cofactor biosynthesis and narrows down the position of these  
540 proteins in the downstream pathway of Fe-S cluster assembly.

541

## 542 MATERIALS AND METHODS

### 543 Plant material and growth conditions

544 The following T-DNA insertion mutants were obtained from Arabidopsis stock centres  
545 (ecotype in brackets, see Supplemental Table S1 for details): *isu1-1*, SALK\_006332 (Col-0);  
546 *isu1-2*, GK\_424D02 (Col-0); *nfu4-1*, SALK\_035493 (Col-0); *nfu4-2*, SALK\_061018 (Col-0);  
547 *nfu4-4*, SAIL\_1233\_C08 (Col-0); *nfu5-1*, WiscDsLoxHs069\_06B (Col-0); *nfu5-2*, SK24394  
548 (Col-4); *nfu5-3*, GT\_3\_2834 (Ler). Homozygous plants were selected using genotyping PCR  
549 and the T-DNA insertion site was verified by sequencing from the left T-DNA border. For  
550 *isu1-1* and *isu1-2*, the right border and contingent genomic DNA was also sequenced.  
551 Primers are listed in Supplemental Table S4. The *nfu5-1* allele needed to be outcrossed to  
552 remove an unrelated leaf phenotype.

553 Seeds were sown onto Levington's F2 compost, or they were surface sterilised using  
554 chlorine gas and spread on ½-strength Murashige and Skoog (MS) medium containing 0.8%  
555 (w/v) agar. After vernalization for 2 days at 4°C, plants were grown under long-day  
556 conditions (16 hours light, 8 hours dark) at 22°C and light intensity of 180-200  $\mu\text{mol m}^{-2} \text{s}^{-1}$   
557 unless otherwise indicated. The generation and propagation of callus cell culture was  
558 performed as previously described (May and Leaver, 1993).

### 559 Gene expression analysis

560 Total RNA was extracted using the Plant RNeasy kit (Qiagen), followed by DNase treatment  
561 (Turbo DNase kit, Agilent). The integrity of RNA in all samples was verified using agarose  
562 gels, and RNA purity was analysed by comparing 260/230 nm and 260/280 nm absorbance  
563 ratios (Nanodrop 2000, Thermo Fisher). RNA was quantified using a Qubit 2.0 fluorometer  
564 (Thermo Fisher). RNA (4  $\mu\text{g}$ ) was reverse transcribed to cDNA using Superscript III (Thermo  
565 Fisher). RT-qPCR reactions were made using SensiFAST master-mix (Bioline), in 20  $\mu\text{l}$   
566 volumes, each with 20 ng of cDNA. Reactions were measured in a Bio-Rad CFX-96 real-  
567 time PCR system and cycled as per the Bioline protocol. Data were analysed using the Bio-  
568 Rad CFX Manager 3.1 software, and were normalized using primer efficiency. The house-  
569 keeping gene *SAND* (*AT2G28390*) was used as reference gene (Han et al., 2013).

### 570 Protein extraction, gel electrophoresis and protein blot analysis

571 To extract proteins, plant tissues were ground in cold buffer containing 50 mM Tris-HCl pH  
572 8.0, 50 mM 2-mercaptoethanol and 1 mM phenylmethylsulfonyl fluoride, then centrifuged for  
573 10 min to remove debris. Mitochondrial proteins from seedlings or cell culture were isolated  
574 according to (Sweetlove et al., 2007). Blue-native polyacrylamide gel electrophoresis (BN-  
575 PAGE) was carried out as described by (Wydro et al., 2013). For protein blot analysis, total  
576 protein extracts or purified mitochondria were separated by SDS-PAGE and transferred to  
577 nitrocellulose membrane by semi-dry electroblotting. To separate NFU4 and NFU5, 17%  
578 (w/v) acrylamide was used in the gels. Blots were labelled with antibodies diluted 1:5000 for  
579 anti-NFU4 and 1:2500 for anti-NFU5, followed by secondary anti-rabbit IgG conjugated to  
580 horseradish peroxidase, and detected by chemiluminescence.

581 To produce antibodies for NFU4 and NFU5, recombinant proteins were expressed  
582 and purified as described in (Zannini et al., 2018). These were used to raise polyclonal  
583 antibodies in rabbits by the Agro-Bio company (La Ferté Saint Aubin, France). Antibodies  
584 against the following proteins have been published: ISU1 (León et al., 2005); GRXS15  
585 (Moseler et al., 2015); INDH and PDH E1 alpha (Wydro et al., 2013); and TOM40 (Carrie et

586 al., 2009). Antibodies against aconitase (AS09 521) and GDC-H protein (AS05 074) were  
587 from Agrisera, Vännäs, Sweden; Antibodies against lipoate (ab58724) were purchased from  
588 Abcam, Cambridge, UK and monoclonal antibodies against actin (clone mAbGEa, product  
589 number MA1-744) were from ThermoFisher Scientific.

#### 590 **Free amino acids and organic acids**

591 Unbound, water soluble amino acids were extracted according to (Winter et al., 1992), with  
592 minor modifications. Approximately 30 mg of whole seedling were homogenised in 60 µl of  
593 20 mM HEPES pH 7.0, 5 mM EDTA and 10 mM NaF. After addition of 250 µl of  
594 chloroform:methanol (1.5:3.5 volumes) and incubation on ice for 30 min, the water-soluble  
595 amino acids were extracted twice with 300 µl of HPLC-grade H<sub>2</sub>O. The aqueous phases  
596 were combined and stored at -80°C until further analysis. Samples were filtered and diluted  
597 50x in water. Ten µl of each sample was derivatized using the AccQ tag kit following  
598 manufacturer's instructions (Waters, UK) and 2 µl was used for injection. Derivatized amino  
599 acids were separated on a 100 mm × 2.1 mm, 2.7 µm Kinetex XB-C18 column  
600 (Phenomenex, USA) in an Acquity UPLC using a 20 min gradient of 1 to 20 % acetonitrile  
601 versus 0.1 % formic acid in water, run at 0.58 ml.min<sup>-1</sup> at 25°C. The UPLC was attached to a  
602 TQS tandem mass spectrometer (Waters, UK) instrument for detection of the correct  
603 masses and quantitative measurement.

604 The organic acids citrate, α-ketoglutarate, malate, pyruvate and succinate were  
605 measured using a recently developed method (Marquis et al., 2017). In brief, 30 mg of whole  
606 seedlings were homogenised in 900 µl methanol:H<sub>2</sub>O (50:50 by volume, ice cold). After  
607 centrifugation at 15000 x g for 10 min at 4°C, the supernatant was evaporated in a GeneVac  
608 EZ-2 Plus (SP Industries, USA) and stored at -80°C until further analysis. Samples were then  
609 resuspended in 15 µl of water and derivatised with 50 µl of 10 mM 4-bromo-N-  
610 methylbenzylamine in acetonitrile and 25 µl of 1 M 1-ethyl-3-(3-dimethylaminopropyl)  
611 carbodiimide hydrochloride in acetonitrile:water (90:10 by volume) for 90 min at 37°C.  
612 Samples were run on an Acquity UPLC equipped with a Xevo TQS tandem mass  
613 spectrometer (Waters, UK) and a 100×2.1mm 2.6µm Kinetex EVO C18 column  
614 (Phenomenex). The following gradient of 1% (v/v) formic acid in acetonitrile versus 1% (v/v)  
615 formic acid in water, at 0.6 ml/min, 40°C was used: (0 min) 40%, (1 min) 40%, (2 min) 45%,  
616 (6.5 min) 95%, (7 min) 95%, (7.5 min) 100%, (8.5 min) 100%, (8.6 min) 40%, (12 min) 40%.

617

#### 618 **Oxygen electrode and enzyme assays**

619 Oxygen consumption rates of intact seedlings were measured using an Oxygraph  
620 (Hansatech, King's Lynn, UK). Seedlings were transferred from ½ MS agar plates to 2 ml  
621 water in the oxygen electrode chamber and kept dark during the measurement. Aconitase  
622 activity was determined in total cell extracts in a coupled reaction with isocitrate, as  
623 described (Ströher et al., 2016). Succinate:ubiquinone reductase (SQR) activity of complex  
624 II, including preparation of mitochondria-enriched fractions from seedlings, was essentially  
625 as described by León et al (2007), except that 10 mM 2-thenoyltrifluoroacetone (TTFA)  
626 instead of 1 mM was used as specific complex II inhibitor. Addition of 10 mM TTFA in  
627 dimethyl sulfoxide (10 µl in a 1-ml reaction) inhibited SQR activity by 50-60%, but there was  
628 no inhibition with dimethyl sulfoxide alone.

629

#### 630 **Yeast 2-hybrid assays**

631 Open reading frames corresponding to the presumed mature forms of NFU4, NFU5, LIP1,  
632 BIO2, ACO2 (primers in Supplemental Table S4) were cloned into the pGADT7 and pGBKT7

633 vectors (Clontech) between the *NdeI* or *NcoI* and *BamHI* restriction sites in order to express  
634 N-terminal fusion proteins with the GAL4 DNA binding domain (BD) or with the GAL4  
635 activation domain (AD), respectively, under the control of the *ADH1* promoter. The plasmids  
636 were co-transformed by heat shock treatment into the GAL4-based yeast 2-hybrid reporter  
637 strain CY306, which is deficient for cytosolic thioredoxins (*MAT $\alpha$* , *ura3-52*, *his3-200*, *ade2-*  
638 *101*, *lys2-801*, *leu2-3*, *leu2-112*, *trp11-901*, *gal4-542*, *gal80-538*, *lys2::UASGAI1-TATAGAL1-*  
639 *HIS3*, *URA3::UASGal4* 17MERS(x3)-TATACYC1-LacZ, *trx1::KanMX4*, *trx2::KanMX4*  
640 (Vignols et al., 2005). Transformants were selected on yeast nitrogen base (YNB) medium  
641 (0.7% yeast extract w/o amino acids, 2% glucose, 2% agar) without tryptophan and leucine  
642 (-Trp, -Leu). Two clones were selected and interactions were observed as cells growing on  
643 YNB medium in the absence of histidine (-His-Trp-Leu) at 30°C. The strength of the  
644 interactions was evaluated by challenging growth in the presence of 2 or 5 mM of the  
645 competitive inhibitor of *HIS3* gene product 3-amino-1,2,4-triazole. Images were taken 5 days  
646 after spotting on plates (7  $\mu$ l/dot at an optical density of 0.05 at 600 nm). Absence of auto-  
647 activation capacities of the *HIS3* reporter gene by all constructs used in this study was  
648 systematically assayed after co-transformation of yeast cells by individual constructs  
649 producing a fusion protein with the corresponding empty pGADT7 or pGBKT7 vectors.

### 650 **Confocal microscopy**

651 For localization of GFP-fusion proteins, full-length open reading frames (ORFs) of *NFU4* and  
652 *NFU5*, or the predicted MTS (amino acids 1-74 for *NFU5* and 1-79 for *NFU4*) were amplified  
653 from *A. thaliana* leaf cDNA and cloned between *NcoI* and *BamHI* sites of pCK-GFP-C65T  
654 (2x *CaMV* 35S promoter, C-terminal GFP (Reichel et al., 1996). For BiFC, full-length ORFs  
655 of *NFU4*, *NFU5* and *LIP1* were amplified and cloned upstream of the C-terminal and N-  
656 terminal regions of the mVenus YFP protein into the pUC-SPYCE and pUC-SPYNE vectors  
657 (Walter et al., 2004, abbreviated -C and -N in figures, respectively) using the restriction sites  
658 *XbaI* and *XhoI* or *SmaI*. Primers for amplification are listed in Supplemental Table S4.

659 Leaf protoplasts were prepared from 21- to 28-day old *Arabidopsis* seedlings,  
660 transfected according to (Yoo et al., 2007) and imaged after 20 - 24 h. Prior to confocal  
661 analyses, the protoplasts were incubated with 20 nM MitoTracker® Orange CMXRos  
662 (ThermoFisher) to fluorescently label the mitochondria.

663 Image acquisition for *NFU*-GFP localization was performed using a Zeiss LSM780  
664 confocal laser scanning microscope, and a water-corrected C-Apochromat 40 $\times$  objective  
665 with a numerical aperture (NA) of 1.2. Signals were detected according to the following  
666 excitation/emission wavelengths: GFP (488 nm/494–534 nm), MitoTracker (561 nm/569–613  
667 nm) and chloroplast autofluorescence (488 and 561 nm/671–720 nm). Pictures were  
668 analyzed using ImageJ software (<https://imagej.nih.gov/ij/>).

669 Image acquisition for BiFC was performed on a Leica TCS SP8 confocal laser-  
670 scanning microscope using a water x40 objective. Wavelengths for excitation/emission were:  
671 mVenus (514 nm/520–550 nm), MitoTracker (560 nm/580-620). Images were obtained using  
672 LAS X software and processed with Adobe Photoshop CS3 at high resolution. All confocal  
673 images shown here were captured without Z-stack intensity projection.

### 674 **Accession Numbers**

675 Accession numbers are as follows: AT3G20970, *NFU4*; AT1G51390, *NFU5*; AT4G22220,  
676 *ISU1*; AT2G20860, *LIP1*.

677

### 678 **ACKNOWLEDGMENTS**



679 We thank Brigitte Touraine, Cyril Magno and Frédéric Gaymard (INRA Montpellier) for  
680 mutant selection, seed propagation and initial phenotyping; Delphine Bernard (Department  
681 of Plant Sciences, University of Cambridge) for initial studies on the *isu1-1* and *nfu4-2*  
682 mutants; Rob Green and Lucy Anderson (John Innes Centre, JIC) for technical assistance;  
683 Markus Dräger (JIC) for root growth measurements and cloning of the ABI3:NFU4 construct;  
684 Baldeep Kular (JIC Metabolomics Platform) for amino acid analysis; and the Montpellier  
685 PHIV Platform for assistance with confocal microscopy.

686

687

688

689 **FIGURE LEGENDS**

690 **Figure 1. Genetic analysis of Arabidopsis mutants in *NFU4* and *NFU5*.**

691 **A.** Gene models of *NFU4* and *NFU5* and the positions of T-DNA insertions. Black bars  
692 represent exons, grey bars are the 5' and 3' untranslated regions of the transcript. Triangles  
693 represent T-DNA insertions, their orientation is marked with an arrow to indicate the outward  
694 facing left border primer. The position of the T-DNA relative to the ATG start codon is  
695 indicated by the number of the nucleotide next to the left-border sequence.

696 **B.** Transcript levels of *NFU4* and *NFU5* in leaf tissue of wild type (Col-0, Col-4 or Ler) and  
697 the indicated T-DNA insertion lines, determined by RT-qPCR (graphs) or standard RT-PCR  
698 (right). For RT-qPCR, values are the average of 3 biological samples  $\pm$  SE.

699 **C.** Protein blot analysis of *NFU4* and *NFU5* in mitochondria isolated from seedlings. Blots  
700 were labelled with antibodies against *NFU4*. Ponceau S stain was used to confirm equal  
701 loading and transfer.

702 **D.** Decrease in *NFU5* protein as a consequence of the *nfu5-2* allele, quantified in the *nfu4-2*  
703 mutant background. See Supplemental Fig. S2 for more details of the quantification.

704

705 **Figure 2. *NFU4* and *NFU5* proteins are abundant in all plant organs.**

706 **A.** Protein blot analysis of *NFU4* and *NFU5* in different organs of a 6-week-old Arabidopsis  
707 plant (Col-0), 20  $\mu$ g protein per lane, labelled with *NFU4* antibodies. Coomassie Blue  
708 staining of the gel after transfer was used as loading control. lvs, leaves.

709 **B.** Specific affinity of the polyclonal antibodies raised against *NFU4* and *NFU5*.  
710 Luminescence signals of known amounts of recombinant proteins were compared with  
711 signals in purified mitochondria from wild-type (WT) leaves and from cell culture of *nfu4-2*  
712 and *nfu5-1* mutants. Each antiserum cross-reacts with the other isoform (90% amino acid  
713 identity), but has a stronger affinity for the protein it was raised against.

714

715 **Figure 3. Phenotypes of *nfu4* and *nfu5* single and double mutants.**

716 **A.** Growth phenotype of 4-week-old plants of the indicated genotype. Scale bar: 1 cm.

717 **B.** Images of open siliques with immature seeds in wild type (Col-0) and the indicated mutant  
718 lines. Scale bars: 0.5 mm.

719 **C.** Frequency of normal and aborted embryos in *nfu4 nfu5-1/+* plants. \*\*\* $p < 0.0001$  for 1:3  
720 segregation ratio ( $\chi^2$  test).

721 **D.** An aborted and healthy embryo from the silique of a *nfu4-2 nfu5-1/+* plant. Plant tissue  
722 was cleared with Hoyer's solution and imaged with DIC microscopy. Scale bars: 50  $\mu$ m.

723

724 **Figure 4. Analysis of *nfu4 nfu5* hemizygous and double mutants.**

725 **A.** Protein blot analysis using protein extracts of mitochondria isolated from callus of wild  
726 type (Col-0), hemizygous and *nfu4-2 nfu5-2* double mutants as indicated. Antibodies against  
727 the following proteins were used: *NFU4* and *NFU5*; the Fe-S scaffold protein ISU1,  
728 glutaredoxin GRXS15, complex I assembly factor INDH, aconitase (ACO), the H protein  
729 subunit of the glycine decarboxylase complex (GDC), E1 $\alpha$  subunit of pyruvate  
730 dehydrogenase (PDH) and the translocase of the outer membrane TOM40.

731 **B.** Growth phenotype of 4-week-old wild-type and *nfu4-2 nfu5* plants. Scale bar: 0.5 cm

732 **C.** Blue-Native PAGE of mitochondrial complexes I, III and V stained with Coomassie Blue  
733 (left panel) and by NADH/NBT activity staining for complex I (right panel) in the indicated  
734 plant lines.

735

736 **Figure 5. Seedlings depleted of NFU4 and NFU5 proteins have a pleiotropic phenotype**

737 **A.** Scheme for obtaining a mutant line expressing NFU4 under the control of the ABI3  
738 promoter in a *nfu4 nfu5* knockout background. The ABI3 promoter is active during  
739 embryogenesis but switched off after seed germination. The observed segregation numbers  
740 in T2 seedling from 3 independent lines were: 76 chlorotic/small and 260 wild-type  
741 appearance (total  $n = 336$ ).

742 **B.** Representative images of a wild-type (WT) seedling and the two classes of segregants,  
743 mutant (m) and wild type-like (wtl), grown for 21 days on  $\frac{1}{2}$  MS medium in 8 h light / 16 h  
744 dark cycles. Scale bars: 0.5 cm.

745 **C.** PCR genotyping results of mutant (m) and wild-type-like (wtl) seedlings from 3  
746 independent lines, showing the absence or presence of a functional NFU5 sequence using  
747 primers AM84 and AM85.

748 **D.** Protein blot analysis of NFU4 and NFU5 in plants lines as in (C).

749

750 **Figure 6. The *nfu4 nfu5* double mutant shows decreased protein lipoylation affecting**  
751 **lipoyl-dependent metabolism.**

752 **A.** Representative images of *nfu4 nfu5* double mutant segregants (m) and sibling wild-type  
753 like (wtl) seedlings, grown on  $\frac{1}{2}$  MS agar plates under ambient CO<sub>2</sub> and 1% CO<sub>2</sub> in the  
754 greenhouse (8/16 h light/dark cycles, variable temperature, ~90% humidity). Scale bars: 0.5  
755 cm. Additional images in Supplemental Fig. S7.

756 **B.** Concentrations of selected free amino acids and organic acids in 3-week-old seedlings of  
757 the indicated genotypes. Values represent the average of 3-6 biological replicates  $\pm$  SD. \* $p <$   
758 0.05, \*\* $p <$  0.01, \*\*\* $p <$  0.001 (Student *t*-test, pairwise comparison to wild type). See  
759 Supplemental Tables S2 and S3 for complete data sets.

760 **C.** Protein blot analysis for lipoyl cofactor (top) and H protein isoforms of glycine  
761 decarboxylase complex (bottom), in wild type (WT), *nfu4 nfu5* (m) and wtl segregants. See  
762 also Supplemental Fig. S8.

763

764 **Figure 7. NFU4 and NFU5 are not required for the Fe-S enzymes aconitase and complex**  
765 **II.**

766 **A.** Respiration in intact seedlings measured using a liquid-phase oxygen electrode. WT, wild  
767 type (Col-0); m, *nfu4-2 nfu5-1* mutant expressing *ABI3prom:NFU4*; wtl, wild-type-like *nfu4-2*  
768 *NFU5* segregants. Values represent the mean oxygen consumption per g fresh weight  $\pm$  SD  
769 ( $n = 3$ ). \*\*\* $p <$  0.001 (Student *t*-test).

770 **B.** Aconitase activity in total cell extracts in seedlings grown under ambient and 1% CO<sub>2</sub> for 3  
771 weeks. Values represent the mean  $\pm$  SD ( $n = 3-4$ ). \* $p <$  0.05 (Student *t*-test).

772 **C.** Complex II activity measured as electron transfer from succinate to ubiquinol (SQR) using  
773 the electron acceptor 2,6-dichloroindophenol (DCIP) in enriched mitochondrial fractions. The  
774 complex II inhibitor TTFA was added at a concentration of 0.1 mM, and only the TTFA-  
775 sensitive activity is given here. Values represent the mean SQR activity in 2 independent  
776 small-scale mitochondrial preparations of mutant and wild-type like seedlings.

777

778 **Figure 8. NFU4 and NFU5 proteins interact with LIP1.**

779 **A.** Yeast 2-hybrid analysis to test direct interaction between NFU4/NFU5 and mitochondrial  
780 lipoyl synthase (LIP1), biotin synthase (BIO2) and the main mitochondrial aconitase (ACO2).  
781 AD-, Gal4 activation domain; BD-, DNA binding domain, both at the N-terminal position.  
782 Images were taken after 5 days and are representative of at least 3 independent  
783 transformations.

784 **B.** Bimolecular Fluorescence Complementation to test interaction between NFU4/NFU5 and  
785 LIP1. The coding sequences were placed upstream of the N-terminal or C-terminal region of  
786 YFP, and the plasmids transformed into Arabidopsis protoplasts. Results are representative  
787 of at least two independent transfection experiments and  $\geq 20$  fluorescent cells per  
788 transformation event. Images are provided with (Fig. 8B) and without (Supplemental Fig. S7)  
789 maximal Z-stack intensity projections. Scale bars: 10  $\mu\text{m}$ .

790

791

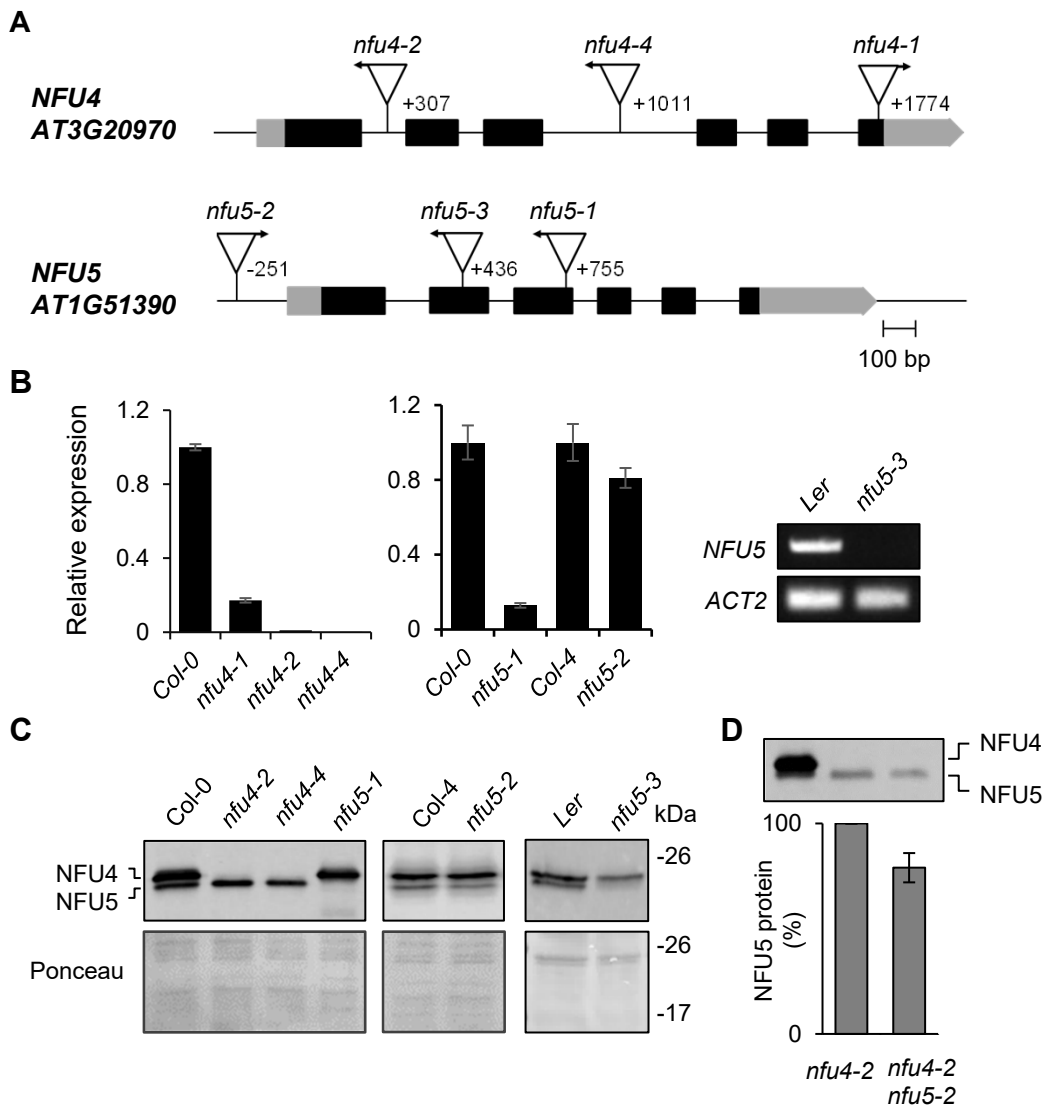

**Figure 1. Genetic analysis of Arabidopsis mutants in *NFU4* and *NFU5***

**A.** Gene models of *NFU4* and *NFU5* and the positions of T-DNA insertions. Black bars represent exons, grey bars are the 5' and 3' untranslated regions of the transcript. Triangles represent T-DNA insertions, their orientation is marked with an arrow to indicate the outward facing left border primer. The position of the T-DNA relative to the ATG start codon is indicated by the number of the nucleotide next to the left-border sequence.

**B.** Transcript levels of *NFU4* and *NFU5* in leaf tissue of wild type (Col-0, Col-4 or Ler) and the indicated T-DNA insertion lines, determined by RT-qPCR (graphs) or standard RT-PCR (right). For RT-qPCR, values are the average of 3 biological samples  $\pm$  SE.

**C.** Protein blot analysis of *NFU4* and *NFU5* in mitochondria isolated from seedlings. Blots were labelled with antibodies against *NFU4*. Ponceau S stain was used to confirm equal loading and transfer.

**D.** Decrease in *NFU5* protein as a consequence of the *nfu5-2* allele, quantified in the *nfu4-2* mutant background. See Supplemental Fig. S2 for more details of the quantification.

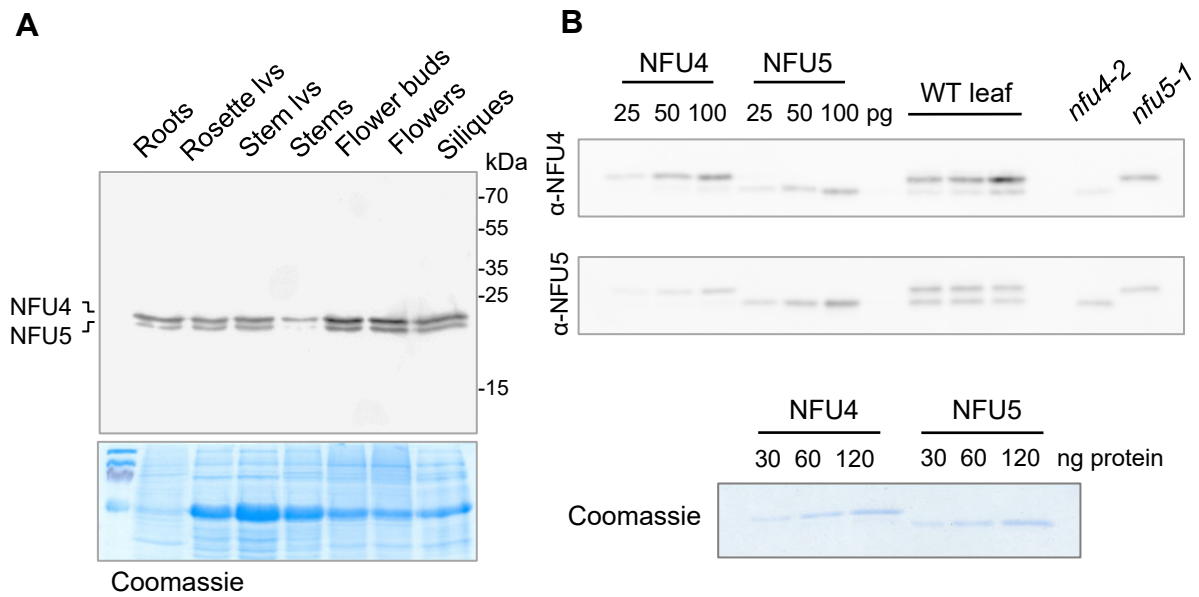

**Figure 2. NFU4 and NFU5 proteins are abundant in all plant organs**

**A.** Protein blot analysis of NFU4 and NFU5 in different organs of a 6-week-old Arabidopsis plant (Col-0), 20  $\mu$ g protein per lane, labelled with NFU4 antibodies. Coomassie Blue staining of the gel after transfer was used as loading control. lvs, leaves.

**B.** Specific affinity of the polyclonal antibodies raised against NFU4 and NFU5. Luminescence signals of known amounts of recombinant proteins were compared with signals in purified mitochondria from wild-type (WT) leaves and from cell culture of *nfu4-2* and *nfu5-1* mutants. Each antiserum cross-reacts with the other isoform (90% amino acid identity), but has a stronger affinity for the protein it was raised against.

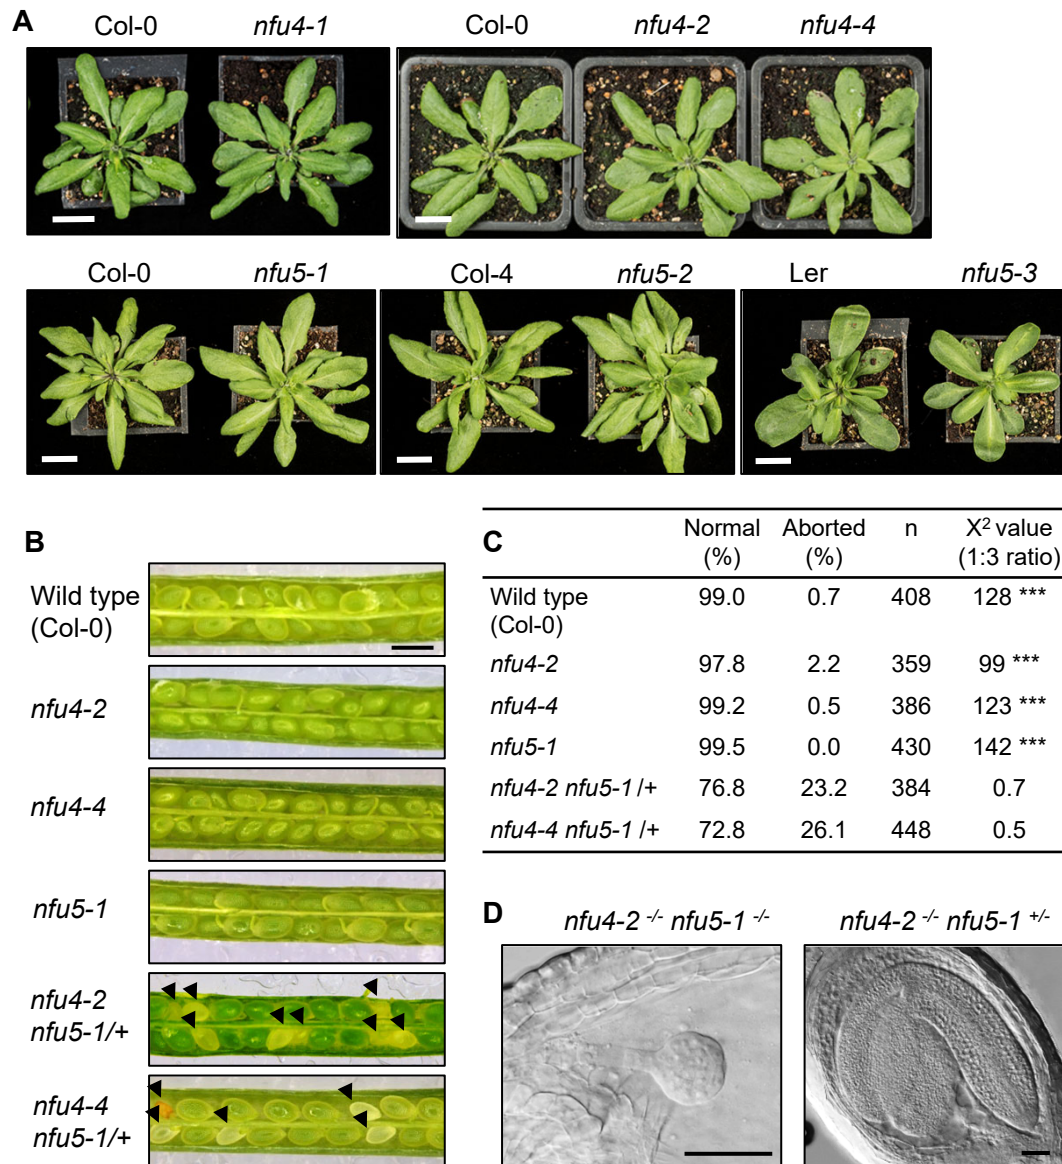

**Figure 3. Phenotypes of *nfu4* and *nfu5* single and double mutants**

**A.** Growth phenotype of 4-week-old plants of the indicated genotype. Scale bar: 1 cm.

**B.** Images of open siliques with immature seeds in wild type (Col-0) and the indicated mutant lines. Scale bars: 0.5 mm.

**C.** Frequency of normal and aborted embryos in *nfu4 nfu5-1/+* plants. \*\*\* $p < 0.0001$  for 1:3 segregation ratio ( $\chi^2$  test).

**D.** An aborted and healthy embryo from the silique of a *nfu4-2 nfu5-1/+* plant. Plant tissue was cleared with Hoyer's solution and imaged with DIC microscopy. Scale bars: 50  $\mu$ m.

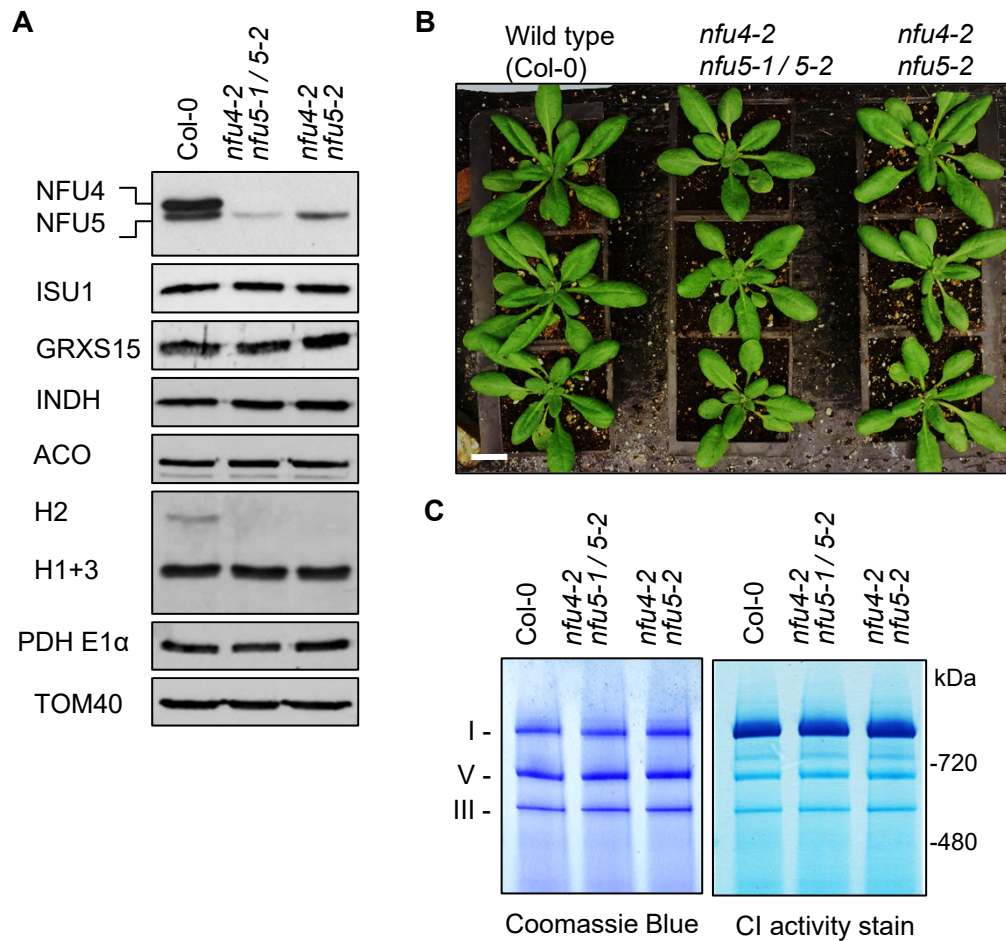

**Figure 4. Analysis of *nfu4 nfu5* hemizygous and double mutants**

**A.** Protein blot analysis using protein extracts of mitochondria isolated from callus of wild type (Col-0), hemizygous and *nfu4-2 nfu5-2* double mutants as indicated. Antibodies against the following proteins were used: NFU4 and NFU5; the Fe-S scaffold protein ISU1, glutaredoxin GRXS15, complex I assembly factor INDH, aconitase (ACO), the H protein subunit of the glycine decarboxylase complex (GDC), E1 $\alpha$  subunit of pyruvate dehydrogenase (PDH) and the translocase of the outer membrane TOM40.

**B.** Growth phenotype of 4-week-old wild-type and *nfu4-2 nfu5* plants. Scale bar: 0.5 cm

**C.** Blue-Native PAGE of mitochondrial complexes I, III and V stained with Coomassie Blue (left panel) and by NADH/NBT activity staining for complex I (right panel) in the indicated plant lines.



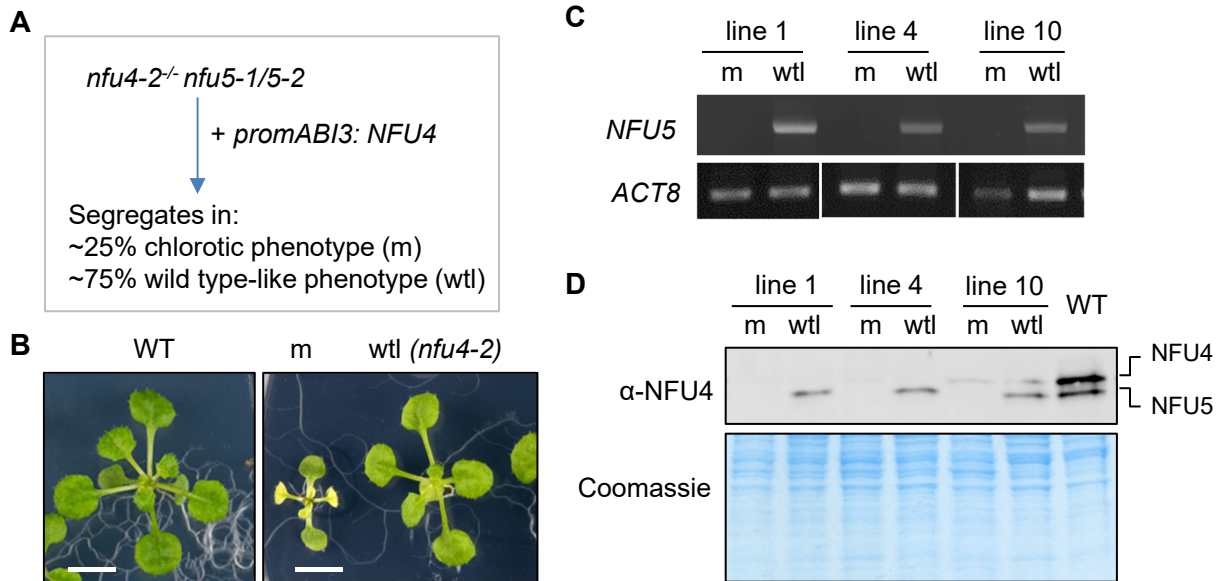

**Figure 5. Seedlings depleted of NFU4 and NFU5 proteins have a pleiotropic phenotype**

**A.** Scheme for obtaining a mutant line expressing *NFU4* under the control of the *ABI3* promoter in a *nfu4 nfu5* knockout background. The *ABI3* promoter is active during embryogenesis but switched off after seed germination. The observed segregation numbers in T2 seedling from 3 independent lines were: 76 chlorotic/small and 260 wild-type appearance (total n = 336).

**B.** Representative images of a wild-type (WT) seedling and the two classes of segregants, mutant (m) and wild type-like (wtl), grown for 21 days on 1/2 MS medium in 8 h light / 16 h dark cycles. Scale bars: 0.5 cm.

**C.** PCR genotyping results of mutant (m) and wild-type-like (wtl) seedlings from 3 independent lines, showing the absence or presence of a functional *NFU5* sequence using primers AM84 and AM85.

**D.** Protein blot analysis of *NFU4* and *NFU5* in plants lines as in (C).

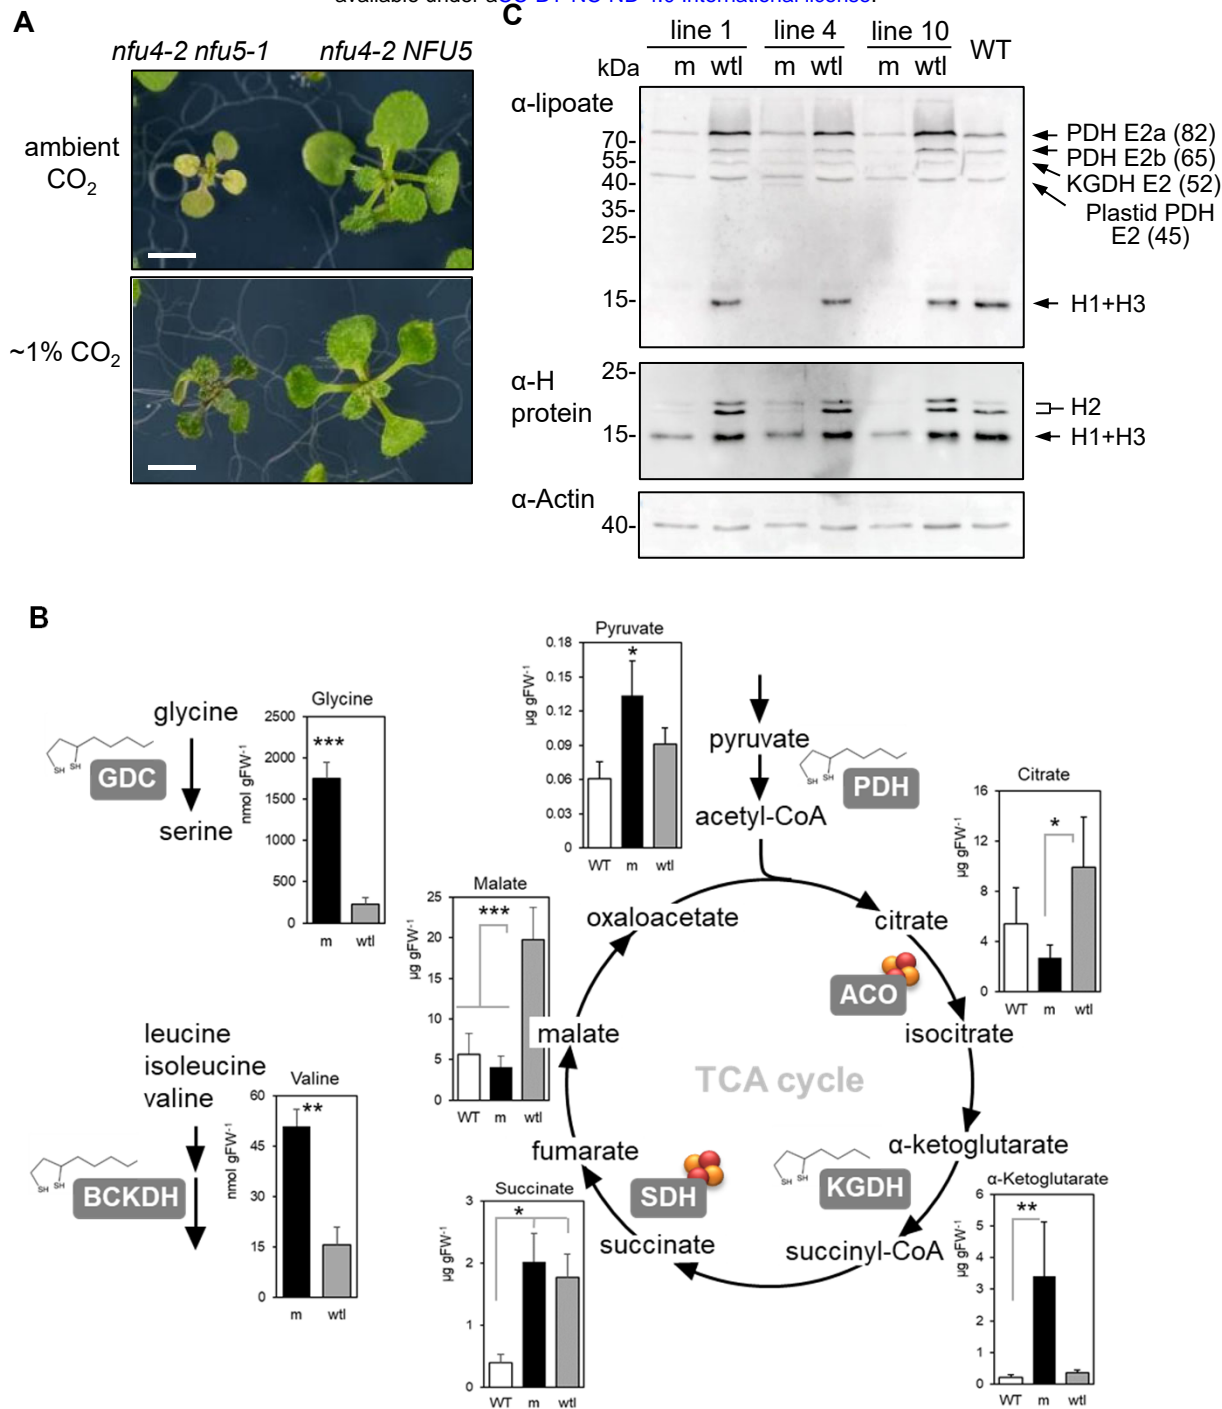

**Figure 6. The *nfu4 nfu5* double mutant shows decreased protein lipoylation affecting lipoyl-dependent metabolism.**

**A.** Representative images of *nfu4 nfu5* double mutant segregants (m) and sibling wild-type like (wtl) seedlings, grown on ½ MS agar plates under ambient CO<sub>2</sub> and 1% CO<sub>2</sub> in the greenhouse (8/16 h light/dark cycles, variable temperature, ~90% humidity). Scale bars: 0.5 cm. Additional images in Supplemental Fig. S7.

**B.** Concentrations of selected free amino acids and organic acids in 3-week-old seedlings of the indicated genotypes. Values represent the average of 3-6 biological replicates ± SD. \*p < 0.05, \*\*p < 0.01, \*\*\*p < 0.001 (Student t-test, pairwise comparison to wild type). See Supplemental Tables S2 and S3 for complete data sets.

**C.** Protein blot analysis for lipoyl cofactor (top) and H protein isoforms of glycine decarboxylase complex (bottom), in wild type (WT), *nfu4 nfu5* (m) and wtl segregants. See also Supplemental Fig. S8.

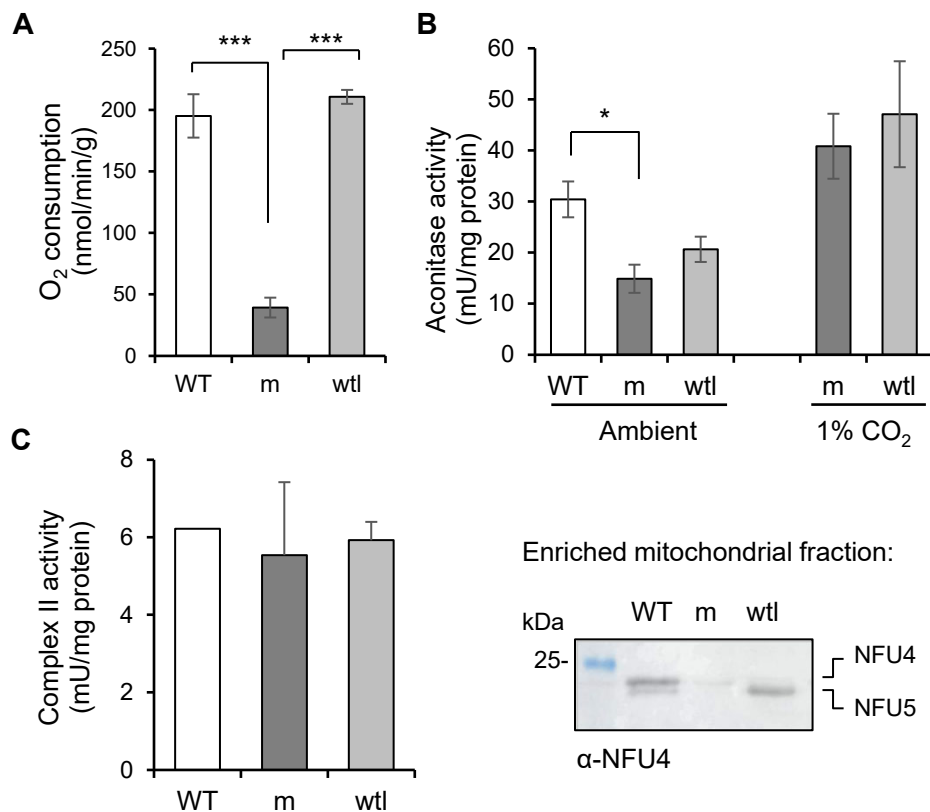

**Figure 7. NFU4 and NFU5 are not required for the Fe-S enzymes aconitase and complex II.**

**A.** Respiration in intact seedlings measured using a liquid-phase oxygen electrode. WT, wild type (*Col-0*); m, *nfu4-2 nfu5-1* mutant expressing *ABI3prom:NFU4*; wtl, wild-type-like *nfu4-2 NFU5* segregants. Values represent the mean oxygen consumption per g fresh weight  $\pm$  SD ( $n = 3$ ). \*\*\* $p < 0.001$  (Student *t*-test).

**B.** Aconitase activity in total cell extracts in seedlings grown under ambient and 1% CO<sub>2</sub> for 3 weeks. Values represent the mean  $\pm$  SD ( $n = 3-4$ ). \* $p < 0.05$  (Student *t*-test).

**C.** Complex II activity measured as electron transfer from succinate to ubiquinol (SQR) using the electron acceptor 2,6-dichloroindophenol (DCIP) in enriched mitochondrial fractions. The complex II inhibitor TTFA was added at a concentration of 0.1 mM, and only the TTFA-sensitive activity is given here. Values represent the mean SQR activity in 2 independent small-scale mitochondrial preparations of mutant and wild-type like seedlings.

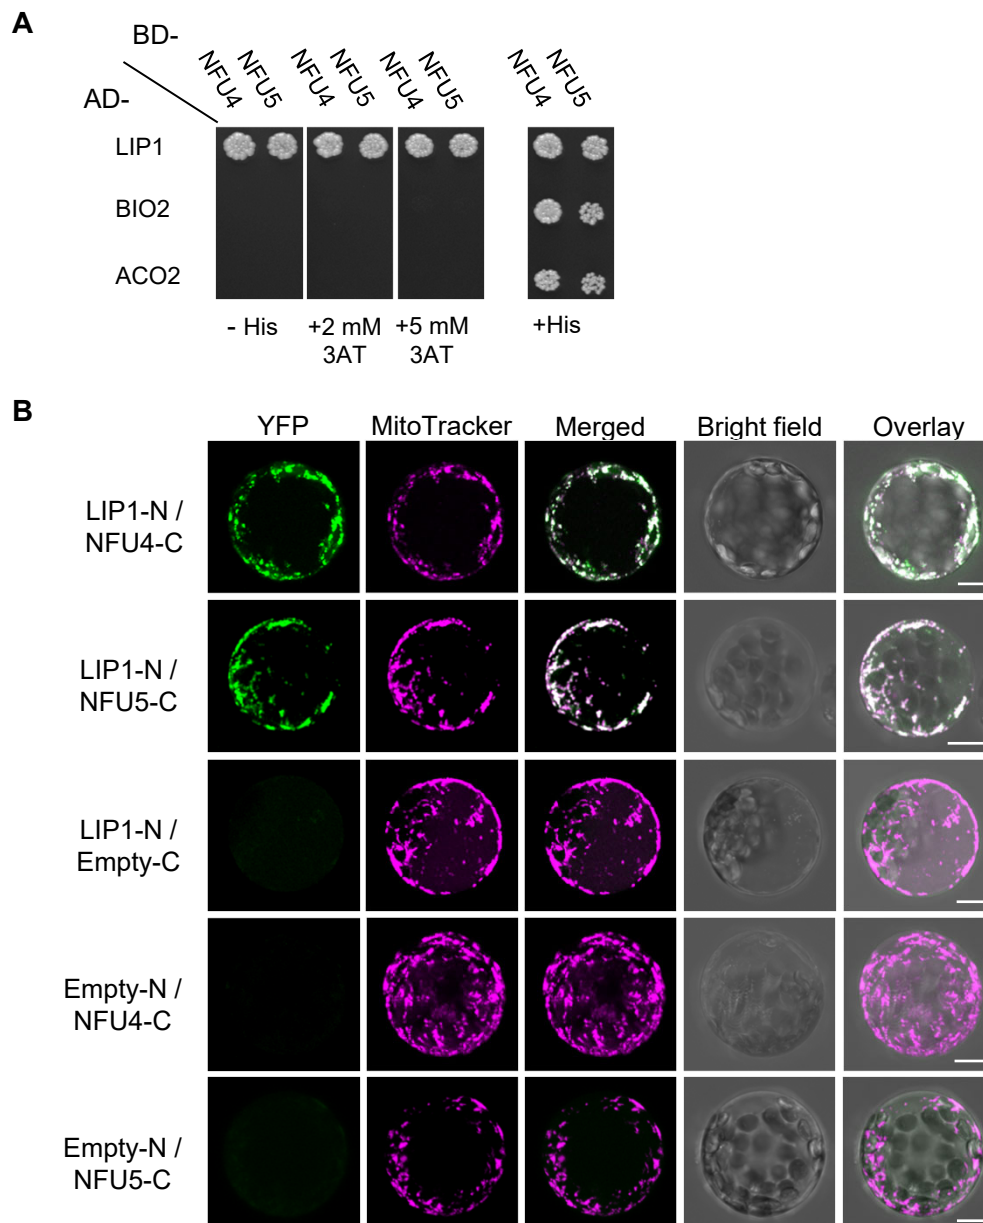

**Figure 8. NFU4 and NFU5 proteins interact with LIP1.**

**A.** Yeast 2-hybrid analysis to test direct interaction between NFU4/NFU5 and mitochondrial lipoyl synthase (LIP1), biotin synthase (BIO2) and the main mitochondrial aconitase (ACO2). AD-, Gal4 activation domain; BD-, DNA binding domain, both at the N-terminal position. Images were taken after 5 days and are representative of at least 3 independent transformations.

**B.** Bimolecular Fluorescence Complementation to test interaction between NFU4/NFU5 and LIP1. The coding sequences were placed upstream of the N-terminal or C-terminal region of YFP, and the plasmids transformed into Arabidopsis protoplasts. Results are representative of at least two independent transfection experiments and  $\geq 20$  fluorescent cells per transformation event. Images are provided with (Fig. 8B) and without (Supplemental Fig. S7) maximal Z-stack intensity projections. Scale bars: 10  $\mu$ m.

## Parsed Citations

Angelini S, Gerez C, Choudens SO De, Sanakis Y, Fontecave M, Barras F, Py B (2008) NfuA, a new factor required for maturing Fe/S proteins in *Escherichia coli* under oxidative stress and iron starvation conditions. *J Biol Chem* 283: 14084–14091

Google Scholar: [Author Only](#) [Title Only](#) [Author and Title](#)

Azam T, Przybyla-Toscano J, Vignols F, Couturier J, Rouhier N, Johnson MK (2020a) [4Fe-4S] cluster trafficking mediated by *Arabidopsis* mitochondrial ISCA and NFU proteins. *J Biol Chem* 295: 18367–18378

Google Scholar: [Author Only](#) [Title Only](#) [Author and Title](#)

Azam T, Przybyla-Toscano J, Vignols F, Couturier J, Rouhier N, Johnson MK (2020b) The *Arabidopsis* mitochondrial glutaredoxin GRXS15 provides [2Fe-2S] clusters for ISCA-mediated [4Fe-4S] cluster maturation. *Int J Mol Sci* 21: 9237

Google Scholar: [Author Only](#) [Title Only](#) [Author and Title](#)

Balk J, Schaedler TA (2014) Iron cofactor assembly in plants. *Annu Rev Plant Biol* 65: 125–153

Google Scholar: [Author Only](#) [Title Only](#) [Author and Title](#)

Bao X, Focke M, Pollard M, Ohlrogge J (2000) Understanding in vivo carbon precursor supply for fatty acid synthesis in leaf tissue. *Plant J* 22: 39–50

Google Scholar: [Author Only](#) [Title Only](#) [Author and Title](#)

Berger N, Vignols F, Przybyla-Toscano J, Roland M, Rofidal V, Touraine B, Zienkiewicz K, Couturier J, Feussner I, Santoni V, et al (2020) Identification of client iron–sulfur proteins of the chloroplastic NFU2 transfer protein in *Arabidopsis thaliana*. *J Exp Bot* 71: 4171–4187

Google Scholar: [Author Only](#) [Title Only](#) [Author and Title](#)

Brancaccio D, Gallo A, Mikolajczyk M, Zovo K, Palumaa P, Novellino E, Piccioli M, Ciofi-Baffoni S, Banci L (2014) Formation of [4Fe-4S] clusters in the mitochondrial iron-sulfur cluster assembly machinery. *J Am Chem Soc* 136: 162–50

Google Scholar: [Author Only](#) [Title Only](#) [Author and Title](#)

Cameron JM, Janer A, Levandovskiy V, MacKay N, Rouault T a., Tong WH, Ogilvie I, Shoubridge E a., Robinson BH (2011) Mutations in iron-sulfur cluster scaffold genes NFU1 and BOLA3 cause a fatal deficiency of multiple respiratory chain and 2-oxoacid dehydrogenase enzymes. *Am J Hum Genet* 89: 486–495

Google Scholar: [Author Only](#) [Title Only](#) [Author and Title](#)

Carrie, C, Kühn K, Murcha M, Duncan O, Small I, O'Toole N, Whelan J (2009) Approaches to defining dual-targeted proteins in *Arabidopsis*. *Plant J* 57: 1128–39

Google Scholar: [Author Only](#) [Title Only](#) [Author and Title](#)

Cochemé HM, Murphy MP (2008) Complex I is the major site of mitochondrial superoxide production by paraquat. *J Biol Chem* 283: 1786–98

Google Scholar: [Author Only](#) [Title Only](#) [Author and Title](#)

Couturier J, Touraine B, Briat J-F, Gaymard F, Rouhier N (2013) The iron-sulfur cluster assembly machineries in plants: current knowledge and open questions. *Front Plant Sci* 4: 259

Google Scholar: [Author Only](#) [Title Only](#) [Author and Title](#)

Cronan JE (2016) Assembly of lipoic acid on its cognate enzymes: an extraordinary and essential biosynthetic pathway. *Microbiol Mol Biol Rev* 80: 429–450

Google Scholar: [Author Only](#) [Title Only](#) [Author and Title](#)

Despres B, Delseny M, Devic M (2001) Partial complementation of embryo defective mutations: a general strategy to elucidate gene function. *Plant J* 27: 149–159

Google Scholar: [Author Only](#) [Title Only](#) [Author and Title](#)

Ewald R, Hoffmann C, Florian A, Neuhaus E, Fernie AR, Bauwe H (2014) Lipoate-protein ligase and octanoyltransferase are essential for protein lipoylation in mitochondria of *Arabidopsis*. *Plant Physiol* 165: 978–990

Google Scholar: [Author Only](#) [Title Only](#) [Author and Title](#)

Frazzon A, Ramirez M, Warek U, Balk J, Frazzon J, Dean D, Winkel B (2007) Functional analysis of *Arabidopsis* genes involved in mitochondrial iron-sulfur cluster assembly. *Plant Mol Biol* 64: 225–240

Google Scholar: [Author Only](#) [Title Only](#) [Author and Title](#)

Fu X, Guan X, Garlock R, Nikolau BJ (2020) Mitochondrial fatty acid synthase utilizes multiple acyl carrier protein isoforms. *Plant Physiol* 183: 547–557

Google Scholar: [Author Only](#) [Title Only](#) [Author and Title](#)

Fuchs P, Rugen N, Carrie C, Elsässer M, Finkemeier I, Giese J, Hildebrandt TM, Kühn K, Maurino VG, Ruberti C, et al (2020) Single organelle function and organization as estimated from *Arabidopsis* mitochondrial proteomics. *Plant J* 101: 420–441

Google Scholar: [Author Only](#) [Title Only](#) [Author and Title](#)

Guan X, Okazaki Y, Lithio A, Li L, Zhao X, Jin H, Nettleton D, Saito K, Nikolau BJ (2017) Discovery and characterization of the 3-hydroxyacyl-ACP dehydratase component of the plant mitochondrial fatty acid synthase system. *Plant Physiol* 173: 2010–2028

Google Scholar: [Author Only](#) [Title Only](#) [Author and Title](#)

**Guan X, Okazaki Y, Zhang R, Saito K, Nikolau BJ (2020) Dual-localized enzymatic components constitute the fatty acid synthase systems in mitochondria and plastids. *Plant Physiol* 183: 517–529**

Google Scholar: [Author Only](#) [Title Only](#) [Author and Title](#)

**Han B, Yang Z, Samma M, Wang R, Shen W (2013) Systematic validation of candidate reference genes for qRT-PCR normalization under iron deficiency in *Arabidopsis*. *BioMetals* 26: 403–413**

Google Scholar: [Author Only](#) [Title Only](#) [Author and Title](#)

**Hildebrandt TM, Nunes Nesi A, Araújo WL, Braun HP (2015) Amino acid catabolism in plants. *Mol Plant* 8: 1563–1579**

Google Scholar: [Author Only](#) [Title Only](#) [Author and Title](#)

**Ito J, Heazlewood J, Millar A (2006) Analysis of the soluble ATP-binding proteome of plant mitochondria identifies new proteins and nucleotide triphosphate interactions within the matrix. *J Proteome Res* 5: 3459–69**

Google Scholar: [Author Only](#) [Title Only](#) [Author and Title](#)

**Ke J, Behal R, Back S, Nikolau B, Wurtele E, Oliver D (2000) The role of pyruvate dehydrogenase and acetyl-coenzyme A synthetase in fatty acid synthesis in developing *Arabidopsis* seeds. *Plant Physiol* 123: 497–508**

Google Scholar: [Author Only](#) [Title Only](#) [Author and Title](#)

**Lee CP, Eubel H, O'Toole N, Millar AH (2008) Heterogeneity of the mitochondrial proteome for photosynthetic and non-photosynthetic *Arabidopsis* metabolism. *Mol Cell Proteomics* 7: 1297–1316**

Google Scholar: [Author Only](#) [Title Only](#) [Author and Title](#)

**León G, Holuigue L, Jordana X (2007) Mitochondrial complex II is essential for gametophyte development in *Arabidopsis*. *Plant Physiol* 143: 1534–1546**

Google Scholar: [Author Only](#) [Title Only](#) [Author and Title](#)

**León S, Touraine B, Briat JF, Lobréaux S (2005) Mitochondrial localization of *Arabidopsis thaliana* Isu Fe-S scaffold proteins. *FEBS Lett* 579: 1930–1934**

Google Scholar: [Author Only](#) [Title Only](#) [Author and Title](#)

**León S, Touraine B, Ribot C, Briat JF, Lobréaux S (2003) Iron-sulphur cluster assembly in plants: Distinct NFU proteins in mitochondria and plastids from *Arabidopsis thaliana*. *Biochem J* 371: 823–830**

Google Scholar: [Author Only](#) [Title Only](#) [Author and Title](#)

**Lill R, Freibert S (2020) Mechanisms of mitochondrial iron-sulfur protein biogenesis. *Annu Rev Biochem* 89: 471–499**

Google Scholar: [Author Only](#) [Title Only](#) [Author and Title](#)

**Marquis B, Louks H, Bose C, Wolfe R, Singh S (2017) A new derivatization reagent for HPLC-MS analysis of biological organic acids. *Chromatographia* 80: 1723–1732**

Google Scholar: [Author Only](#) [Title Only](#) [Author and Title](#)

**May M, Leaver C (1993) Oxidative stimulation of glutathione synthesis in *Arabidopsis thaliana* suspension cultures. *Plant Physiol* 103: 621–627**

Google Scholar: [Author Only](#) [Title Only](#) [Author and Title](#)

**Mayr JA, Feichtinger RG, Tort F, Ribes A, Sperl W (2014) Lipoic acid biosynthesis defects. *J Inher Metab Dis* 37: 553–563**

Google Scholar: [Author Only](#) [Title Only](#) [Author and Title](#)

**McCarthy EL, Booker SJ (2017) Destruction and reformation of an iron-sulfur cluster during catalysis by lipoyl synthase. *Science* 358: 373–377**

Google Scholar: [Author Only](#) [Title Only](#) [Author and Title](#)

**Melber A, Na U, Vashisht A, Weiler BD, Lill R, Wohlschlegel JA, Winge DR (2016) Role of Nfu1 and Bol3 in iron-sulfur cluster transfer to mitochondrial clients. *Elife* 5: 1–24**

Google Scholar: [Author Only](#) [Title Only](#) [Author and Title](#)

**Meyer E, Solheim C, Tanz S, Bonnard G, Millar A (2011) Insights into the composition and assembly of the membrane arm of plant complex I through analysis of subcomplexes in *Arabidopsis* mutant lines. *J Biol Chem* 286: 26081–92**

Google Scholar: [Author Only](#) [Title Only](#) [Author and Title](#)

**Moseler A, Aller I, Wagner S, Nietzel T, Przybyla-Toscano J, Mühlhoff U, Lill R, Berndt C, Rouhier N, Schwarzländer M, et al (2015) The mitochondrial monothiol glutaredoxin S15 is essential for iron-sulfur protein maturation in *Arabidopsis thaliana*. *Proc Natl Acad Sci U S A* 112: 13735–13740**

Google Scholar: [Author Only](#) [Title Only](#) [Author and Title](#)

**Moseler A, Kruse I, Maclean AE, Pedroletti L, Franceschetti M, Wagner S, Wehler R, Fischer-Schrader K, Poschet G, Wirtz M, et al (2021) The function of glutaredoxin GRXS15 is required for lipoyl-dependent dehydrogenases in mitochondria. *Plant Physiol* 186: 1507–1525**

Google Scholar: [Author Only](#) [Title Only](#) [Author and Title](#)

**Mühlhoff U, Lill R (2000) Biogenesis of iron-sulfur proteins in eukaryotes: A novel task of mitochondria that is inherited from**

**bacteria. *Biochim Biophys Acta - Bioenerg* 1459: 370–382**

Google Scholar: [Author Only](#) [Title Only](#) [Author and Title](#)

**Navarro-Sastre A, Tort F, Stehling O, Uzarska MA, Arranz JA, Del Toro M, Labayru MT, Landa J, Font A, Garcia-Villoria J, et al (2011) A fatal mitochondrial disease is associated with defective NFU1 function in the maturation of a subset of mitochondrial Fe-S proteins. *Am J Hum Genet* 89: 656–667**

Google Scholar: [Author Only](#) [Title Only](#) [Author and Title](#)

**Peterhansel C, Horst I, Niessen M, Blume C, Kebeish R, Kürkcüoğlu S, Kreuzaler F (2010) Photorespiration. *The Arabidopsis Book*, e0130**

Google Scholar: [Author Only](#) [Title Only](#) [Author and Title](#)

**Przybyla-Toscano J, Boussardon C, Law S, Rouhier N, Keech O (2021a) Gene atlas of iron-containing proteins in *Arabidopsis thaliana*. *Plant J*. 106: 258-274**

Google Scholar: [Author Only](#) [Title Only](#) [Author and Title](#)

**Przybyla-Toscano J, Christ L, Keech O, Rouhier N (2021b) Iron-sulfur proteins in plant mitochondria: roles and maturation. *J. Exp. Bot.* 72: 2014-2044**

Google Scholar: [Author Only](#) [Title Only](#) [Author and Title](#)

**Py B, Gerez C, Angelini S, Planel R, Vinella D, Loiseau L, Talla E, Brochier-Armanet C, Garcia Serres R, Latour J, et al (2012) Molecular organization, biochemical function, cellular role and evolution of NfuA, an atypical Fe-S carrier. *Mol Genet Genomics* 86: 155–71**

Google Scholar: [Author Only](#) [Title Only](#) [Author and Title](#)

**Reichel C, Mathur J, Eckes P, Langenkemper K, Koncz C, Schell J, Reiss B, Maas C (1996) Enhanced green fluorescence by the expression of an *Aequorea victoria* green fluorescent protein mutant in mono- and dicotyledonous plant cells. *Proc Natl Acad Sci U S A* 93: 5888–5893**

Google Scholar: [Author Only](#) [Title Only](#) [Author and Title](#)

**Reinholdt O, Schwab S, Zhang Y, Reichheld J, Fernie A, Hagemann M, Timm S (2021) Redox-regulation of photorespiration through mitochondrial thioredoxin o1. *Plant Physiol* 181: 442–457**

Google Scholar: [Author Only](#) [Title Only](#) [Author and Title](#)

**Rohde A, Van Montagu M, Boerjan W (1999) The ABSCISIC ACID-INSENSITIVE 3 (ABI3) gene is expressed during vegetative quiescence processes in *Arabidopsis*. *Plant Cell Environ* 22: 261–270**

Google Scholar: [Author Only](#) [Title Only](#) [Author and Title](#)

**Roland M, Przybyla-Toscano J, Vignols F, Berger N, Azam T, Christ L, Santoni V, Wu HC, Dhalleine T, Johnson MK, et al (2020) The plastidial *Arabidopsis thaliana* NFU1 protein binds and delivers [4Fe-4S] clusters to specific client proteins. *J Biol Chem* 295: 1727–1742**

Google Scholar: [Author Only](#) [Title Only](#) [Author and Title](#)

**Schilke B, Voisine C, Beinert H, Craig E (1999) Evidence for a conserved system for iron metabolism in the mitochondria of *Saccharomyces cerevisiae*. *Proc Natl Acad Sci U S A* 96: 10206–10211**

Google Scholar: [Author Only](#) [Title Only](#) [Author and Title](#)

**Ströher E, Grassl J, Carrie C, Fenske R, Whelan J, Millar AH (2016) Glutaredoxin S15 is involved in Fe-S cluster transfer in mitochondria influencing lipoic acid-dependent enzymes, plant growth, and arsenic tolerance in *Arabidopsis*. *Plant Physiol* 170: 1284–1299**

Google Scholar: [Author Only](#) [Title Only](#) [Author and Title](#)

**Sulo P, Martin N (1993) Isolation and characterization of LIP5. A lipoate biosynthesis locus of *Saccharomyces cerevisiae*. *J Biol Chem* 268: 17634–17639**

Google Scholar: [Author Only](#) [Title Only](#) [Author and Title](#)

**Sweetlove LJ, Taylor NL, Leaver CJ (2007) Isolation of intact, functional mitochondria from the model plant *Arabidopsis thaliana*. *Methods Mol Biol* 372: 125–36**

Google Scholar: [Author Only](#) [Title Only](#) [Author and Title](#)

**Tan Y, O'Toole N, Taylor N, Millar A (2010) Divalent metal ions in plant mitochondria and their role in interactions with proteins and oxidative stress-induced damage to respiratory function. *Plant Physiol* 152: 747–61**

Google Scholar: [Author Only](#) [Title Only](#) [Author and Title](#)

**Timm S, Florian A, Arrivault S, Stitt M, Fernie A, Bauwe H (2012) Glycine decarboxylase controls photosynthesis and plant growth. *FEBS Lett* 586: 3692–3697**

Google Scholar: [Author Only](#) [Title Only](#) [Author and Title](#)

**Touraine B, Boutin J, Marion-Poll A, Briat J, Peltier G, S L (2004) Nfu2: a scaffold protein required for [4Fe-4S] and ferredoxin iron-sulphur cluster assembly in *Arabidopsis* chloroplasts. *Plant J* 40: 101–111**

Google Scholar: [Author Only](#) [Title Only](#) [Author and Title](#)

**Touraine B, Vignols F, Przybyla-Toscano J, Ischebeck T, Dhalleine T, Wu HC, Magno C, Berger N, Couturier J, Dubos C, et al (2019) Iron-sulfur protein NFU2 is required for branched-chain amino acid synthesis in *Arabidopsis* roots. *J Exp Bot* 70: 1875–1889**

Google Scholar: [Author Only](#) [Title Only](#) [Author and Title](#)

**Uzarska MA, Przybyla-Toscano J, Spantgar F, Zannini F, Lill R, Mühlenhoff U, Rouhier N (2018) Conserved functions of Arabidopsis mitochondrial late-acting maturation factors in the trafficking of iron-sulfur clusters. Biochim Biophys Acta - Mol Cell Res 1865: 1250–1259**

Google Scholar: [Author Only](#) [Title Only](#) [Author and Title](#)

**Vignols F, Bréhélin C, Surdin-Kerjan Y, Thomas D, Meyer Y (2005) A yeast two-hybrid knockout strain to explore thioredoxin-interacting proteins in vivo. Proc Natl Acad Sci USA 102: 16729–34**

Google Scholar: [Author Only](#) [Title Only](#) [Author and Title](#)

**Wang L, He S, Zhai H, Liu D, Wang Y, Liu Q (2013) Molecular cloning and functional characterization of a salt tolerance-associated gene IbNFU1 from sweet potato. J Integr Agric 12: 27–35**

Google Scholar: [Author Only](#) [Title Only](#) [Author and Title](#)

**Weiler B, Brück M, Kothe I, Bill E, Lill R, Mühlenhoff U (2020) Mitochondrial [4Fe-4S] protein assembly involves reductive [2Fe-2S] cluster fusion on ISCA1-ISCA2 by electron flow from ferredoxin FDX2. Proc Natl Acad Sci USA 117: 20555–20565**

Google Scholar: [Author Only](#) [Title Only](#) [Author and Title](#)

**Winter H, Lohaus G, Heldt H (1992) Phloem transport of amino acids in relation to their cytosolic levels in barley leaves. Plant Physiol 99: 996–1004**

Google Scholar: [Author Only](#) [Title Only](#) [Author and Title](#)

**Wydro MM, Sharma P, Foster JM, Bych K, Meyer EH, Balk J (2013) The evolutionarily conserved iron-sulfur protein INDH is required for complex I assembly and mitochondrial translation in Arabidopsis. Plant Cell 25: 4014–27**

Google Scholar: [Author Only](#) [Title Only](#) [Author and Title](#)

**Yabe T, Morimoto K, Kikuchi S, Nishio K, Terashima I, Nakai M (2004) The Arabidopsis chloroplastic NifU-like protein CnfU, which can act as an iron-sulfur cluster scaffold protein, is required for biogenesis of ferredoxin and photosystem I. Plant Cell 16: 993–1007**

Google Scholar: [Author Only](#) [Title Only](#) [Author and Title](#)

**Yoo SD, Cho YH, Sheen J (2007) Arabidopsis mesophyll protoplasts: a versatile cell system for transient gene expression analysis. Nat Protoc 2: 1565–1572**

Google Scholar: [Author Only](#) [Title Only](#) [Author and Title](#)

**Yuvaniyama P, Agar JN, Cash VL, Johnson MK, Dean DR (2000) NifS-directed assembly of a transient [2Fe-2S] cluster within the NifU protein. Proc Natl Acad Sci U S A 97: 599–604**

Google Scholar: [Author Only](#) [Title Only](#) [Author and Title](#)

**Zannini F, Roret T, Przybyla-Toscano J, Dhalleine T, Rouhier N, Couturier J (2018) Mitochondrial Arabidopsis thaliana TRXo isoforms bind an iron-sulfur cluster and reduce NFU proteins in vitro. Antioxidants (Basel) 1: 142**

Google Scholar: [Author Only](#) [Title Only](#) [Author and Title](#)
